# Supplementary material for: Surviving the host: Microbial metabolic genes required for growth of Pseudomonas aeruginosa in physiologically-relevant conditions
Source: Front Microbiol. 2022 Nov 25;13:1055512. doi: 10.3389/fmicb.2022.1055512 (PMC9732424; doi:10.3389/fmicb.2022.1055512)
Supplement: Supplementary file 1 [file Data_Sheet_1.XLSX]

## Sheet: T0_PAO1_essential_genes
DataSet 1-A T0 essential genes of PAO1 in MHB compared to essential genes in rich media in previous studies. NA indicates PAO1 genes identified in this study that don't have PA14 analogues
Locus Tag	PA14 locus tag	Gene Name	Description	Called Essential by	Poulsen et al. 2019 (PA14)	Lee et al. 2015 (PAO1)	Turner et al 2015 (PAO1)	Turner et al 2015 (PA14)	Skurnik et al 2013 (PA14)	Liberati et al. 2006 (PA14)	Studies (out of 7)
PA3645	PA14_17190	fabZ	(3R)-hydroxymyristoyl-[acyl carrier protein] dehydratase	Tradis	+	+	+	+	+	+	7
PA3744	PA14_15980	rimM	16S rRNA processing protein	Tradis	+	+	+	+	+	+	7
PA3650	PA14_17130	dxr	1-deoxy-d-xylulose 5-phosphate reductoisomerase	Transit & Tradis	+	+	+	+	+	+	7
PA1585	PA14_44010	sucA	2-oxoglutarate dehydrogenase (E1 subunit)	Transit	+	+	+	+	+	+	7
PA4240	PA14_09090	rpsK	30S ribosomal protein S11	Tradis	+	+	+	+	+	+	7
PA4268	PA14_08790	rpsL	30S ribosomal protein S12	Transit & Tradis	+	+	+	+	+	+	7
PA4241	PA14_09080	rpsM	30S ribosomal protein S13	Transit & Tradis	+	+	+	+	+	+	7
PA4257	PA14_08910	rpsC	30S ribosomal protein S3	Transit & Tradis	+	+	+	+	+	+	7
PA4246	PA14_09020	rpsE	30S ribosomal protein S5	Tradis	+	+	+	+	+	+	7
PA4935	PA14_65180	rpsF	30S ribosomal protein S6	Tradis	+	+	+	+	+	+	7
PA4267	PA14_08810	rpsG	30S ribosomal protein S7	Tradis	+	+	+	+	+	+	7
PA4249	PA14_08990	rpsH	30S ribosomal protein S8	Transit & Tradis	+	+	+	+	+	+	7
PA4988	PA14_65960	waaA	3-deoxy-D-manno-octulosonic-acid (KDO) transferase	Transit & Tradis	+	+	+	+	+	+	7
PA2979	PA14_25530	kdsB	3-deoxy-manno-octulosonate cytidylyltransferase	Tradis	+	+	+	+	+	+	7
PA4273	PA14_08730	rplA	50S ribosomal protein L1	Tradis	+	+	+	+	+	+	7
PA4274	PA14_08720	rplK	50S ribosomal protein L11	Tradis	+	+	+	+	+	+	7
PA4433	PA14_57590	rplM	50S ribosomal protein L13	Tradis	+	+	+	+	+	+	7
PA4244	PA14_09040	rplO	50S ribosomal protein L15	Tradis	+	+	+	+	+	+	7
PA4256	PA14_08920	rplP	50S ribosomal protein L16	Transit & Tradis	+	+	+	+	+	+	7
PA4260	PA14_08880	rplB	50S ribosomal protein L2	Transit & Tradis	+	+	+	+	+	+	7
PA2741	PA14_28680	rplT	50S ribosomal protein L20	Transit & Tradis	+	+	+	+	+	+	7
PA4263	PA14_08850	rplC	50S ribosomal protein L3	Transit & Tradis	+	+	+	+	+	+	7
PA4262	PA14_08860	rplD	50S ribosomal protein L4	Tradis	+	+	+	+	+	+	7
PA4251	PA14_08970	rplE	50S ribosomal protein L5	Tradis	+	+	+	+	+	+	7
PA4248	PA14_09000	rplF	50S ribosomal protein L6	Tradis	+	+	+	+	+	+	7
PA4271	PA14_08750	rplL	50S ribosomal protein L7 / L12	Tradis	+	+	+	+	+	+	7
PA3112	PA14_23860	accD	acetyl-CoA carboxylase beta subunit	Tradis	+	+	+	+	+	+	7
PA3639	PA14_17270	accA	acetyl-coenzyme A carboxylase carboxyl transferase (alpha subunit)	Tradis	+	+	+	+	+	+	7
PA5051	PA14_66750	argS	arginyl-tRNA synthetase	Transit & Tradis	+	+	+	+	+	+	7
PA3117	PA14_23800	asd	aspartate semialdehyde dehydrogenase	Transit & Tradis	+	+	+	+	+	+	7
PA5556	PA14_73260	atpA	ATP synthase alpha chain	Tradis	+	+	+	+	+	+	7
PA5554	PA14_73240	atpD	ATP synthase beta chain	Tradis	+	+	+	+	+	+	7
PA5557	PA14_73280	atpH	ATP synthase delta chain	Tradis	+	+	+	+	+	+	7
PA1609	PA14_43690	fabB	beta-ketoacyl-ACP synthase I	Transit & Tradis	+	+	+	+	+	+	7
PA4847	PA14_64100	accB	biotin carboxyl carrier protein (BCCP)	Tradis	+	+	+	+	+	+	7
PA4408	PA14_57290	ftsA	cell division protein FtsA	Transit & Tradis	+	+	+	+	+	+	7
PA4751	PA14_62860	ftsH	cell division protein FtsH	Transit & Tradis	+	+	+	+	+	+	7
PA1528	PA14_44670	zipA	cell division protein ZipA	Tradis	+	+	+	+	+	+	7
PA0001	PA14_00010	dnaA	chromosomal replication initiator protein DnaA	Transit & Tradis	+	+	+	+	+	+	7
PA3088	PA14_24220	NA	conserved hypothetical protein	Transit & Tradis	+	+	+	+	+	+	7
PA0022	PA14_00240	NA	conserved hypothetical protein	Tradis	+	+	+	+	+	+	7
PA0404	PA14_05280	NA	conserved hypothetical protein	Tradis	+	+	+	+	+	+	7
PA3982	PA14_12310	NA	conserved hypothetical protein	Tradis	+	+	+	+	+	+	7
PA3799	PA14_14930	NA	conserved hypothetical protein	Transit & Tradis	+	+	+	+	+	+	7
PA1792	PA14_41400	NA	conserved hypothetical protein	Tradis	+	+	+	+	+	+	7
PA4746	PA14_62780	NA	conserved hypothetical protein	Tradis	+	+	+	+	+	+	7
PA0024	PA14_00280	hemF	coproporphyrinogen III oxidase, aerobic	Transit & Tradis	+	+	+	+	+	+	7
PA3637	PA14_17290	pyrG	CTP synthase	Transit & Tradis	+	+	+	+	+	+	7
PA1795	PA14_41360	cysS	cysteinyl-tRNA synthetase	Transit & Tradis	+	+	+	+	+	+	7
PA5321	PA14_70260	dut	deoxyuridine 5'-triphosphate nucleotidohydrolase	Tradis	+	+	+	+	+	+	7
PA1010	PA14_51270	dapA	dihydrodipicolinate synthase	Tradis	+	+	+	+	+	+	7
PA0350	PA14_04580	folA	dihydrofolate reductase	Tradis	+	+	+	+	+	+	7
PA1587	PA14_43970	lpd	dihydrolipoamide dehydrogenase Lpd	Transit & Tradis	+	+	+	+	+	+	7
PA1586	PA14_44000	sucB	dihydrolipoamide succinyltransferase (E2 subunit)	Transit & Tradis	+	+	+	+	+	+	7
PA0582	PA14_07590	folB	dihydroneopterin aldolase	Tradis	+	+	+	+	+	+	7
PA3168	PA14_23260	gyrA	DNA gyrase subunit A	Transit & Tradis	+	+	+	+	+	+	7
PA0004	PA14_00050	gyrB	DNA gyrase subunit B	Transit & Tradis	+	+	+	+	+	+	7
PA3640	PA14_17260	dnaE	DNA polymerase III, alpha chain	Transit & Tradis	+	+	+	+	+	+	7
PA1816	PA14_41050	dnaQ	DNA polymerase III, epsilon chain	Tradis	+	+	+	+	+	+	7
PA5164	PA14_68210	rmlC	dTDP-4-dehydrorhamnose 3,5-epimerase	Tradis	+	+	+	+	+	+	7
PA5161	PA14_68170	rmlB	dTDP-D-glucose 4,6-dehydratase	Transit & Tradis	+	+	+	+	+	+	7
PA2952	PA14_25860	etfB	electron transfer flavoprotein beta-subunit	Tradis	+	+	+	+	+	+	7
PA4266	PA14_08820	fusA1	elongation factor G	Tradis	+	+	+	+	+	+	7
PA3655	PA14_17070	tsf	elongation factor Ts	Tradis	+	+	+	+	+	+	7
PA4655	PA14_61580	hemH	ferrochelatase	Tradis	+	+	+	+	+	+	7
PA5110	PA14_67490	fbp	fructose-1,6-bisphosphatase	Transit & Tradis	+	+	+	+	+	+	7
PA0555	PA14_07230	fda	fructose-1,6-bisphosphate aldolase	Transit & Tradis	+	+	+	+	+	+	7
PA5549	PA14_73170	glmS	glucosamine--fructose-6-phosphate aminotransferase	Transit & Tradis	+	+	+	+	+	+	7
PA5163	PA14_68200	rmlA	glucose-1-phosphate thymidylyltransferase	Transit & Tradis	+	+	+	+	+	+	7
PA3134	PA14_23560	gltX	glutamyl-tRNA synthetase	Transit & Tradis	+	+	+	+	+	+	7
PA4484	PA14_58190	gatB	Glu-tRNA(Gln) amidotransferase subunit B	Transit & Tradis	+	+	+	+	+	+	7
PA0008	PA14_00090	glyS	glycyl-tRNA synthetase beta chain	Transit & Tradis	+	+	+	+	+	+	7
PA3769	PA14_15340	guaA	GMP synthase	Transit & Tradis	+	+	+	+	+	+	7
PA0771	PA14_54320	era	GTP-binding protein Era	Transit & Tradis	+	+	+	+	+	+	7
PA5336	PA14_70440	gmk	guanylate kinase	Tradis	+	+	+	+	+	+	7
PA5011	PA14_66240	waaC	heptosyltransferase I	Transit & Tradis	+	+	+	+	+	+	7
PA5012	PA14_66250	waaF	heptosyltransferase II	Transit & Tradis	+	+	+	+	+	+	7
PA3802	PA14_14890	hisS	histidyl-tRNA synthetase	Transit & Tradis	+	+	+	+	+	+	7
PA4279	PA14_08630	NA	hypothetical protein	Tradis	+	+	+	+	+	+	7
PA4679	PA14_61890	NA	hypothetical protein	Tradis	+	+	+	+	+	+	7
PA4991	PA14_66000	NA	hypothetical protein	Tradis	+	+	+	+	+	+	7
PA4992	PA14_66010	NA	hypothetical protein	Tradis	+	+	+	+	+	+	7
PA4669	PA14_61750	ipk	isopentenyl monophosphate kinase	Transit & Tradis	+	+	+	+	+	+	7
PA3987	PA14_12230	leuS	leucyl-tRNA synthetase	Transit	+	+	+	+	+	+	7
PA3997	PA14_12120	lipB	lipoate-protein ligase B	Tradis	+	+	+	+	+	+	7
PA4461	PA14_57930	lptB	Lipopolysaccharide export system ATP-binding protein LptB	Tradis	+	+	+	+	+	+	7
PA3827	PA14_14510	lptG	Lipopolysaccharide export system permease protein LptG	Transit & Tradis	+	+	+	+	+	+	7
PA5009	PA14_66220	waaP	lipopolysaccharide kinase WaaP	Transit & Tradis	+	+	+	+	+	+	7
PA2614	PA14_30310	lolA	lipoprotein localization protein LolA	Tradis	+	+	+	+	+	+	7
PA4668	PA14_61740	lolB	lipoprotein localization protein LolB	Tradis	+	+	+	+	+	+	7
PA2986	PA14_25450	lolC	lipoprotein localization protein LolC	Transit & Tradis	+	+	+	+	+	+	7
PA2987	PA14_25440	lolD	lipoprotein localization protein LolD	Tradis	+	+	+	+	+	+	7
PA2988	PA14_25430	lolE	lipoprotein localization protein LolE	Transit & Tradis	+	+	+	+	+	+	7
PA4460	PA14_57920	lptH	LptH	Tradis	+	+	+	+	+	+	7
PA3700	PA14_16530	lysS	lysyl-tRNA synthetase	Transit & Tradis	+	+	+	+	+	+	7
PA1156	PA14_49460	nrdA	NrdA, catalytic component of class Ia ribonucleotide reductase	Transit & Tradis	+	+	+	+	+	+	7
PA1155	PA14_49470	nrdB	NrdB, tyrosyl radical-harboring component of class Ia ribonucleotide reductase	Transit & Tradis	+	+	+	+	+	+	7
PA4052	PA14_11450	nusB	NusB protein	Tradis	+	+	+	+	+	+	7
PA4765	PA14_63030	omlA	Outer membrane lipoprotein OmlA precursor	Tradis	+	+	+	+	+	+	7
PA3648	PA14_17150	opr86	outer membrane protein Opr86	Tradis	+	+	+	+	+	+	7
PA4665	PA14_61700	prfA	peptide chain release factor 1	Transit	+	+	+	+	+	+	7
PA2740	PA14_28690	pheS	phenylalanyl-tRNA synthetase, alpha-subunit	Tradis	+	+	+	+	+	+	7
PA4957	PA14_65500	psd	phosphatidylserine decarboxylase	Tradis	+	+	+	+	+	+	7
PA4415	PA14_57380	mraY	phospho-N-acetylmuramoyl-pentapeptide-transferase	Transit & Tradis	+	+	+	+	+	+	7
PA4068	PA14_11260	NA	probable epimerase	Transit & Tradis	+	+	+	+	+	+	7
PA3813	PA14_14740	iscU	probable iron-binding protein IscU	Tradis	+	+	+	+	+	+	7
PA3803	PA14_14880	gcpE	probable isoprenoid biosynthetic protein GcpE	Tradis	+	+	+	+	+	+	7
PA0341	PA14_04460	lgt	prolipoprotein diacylglyceryl transferase	Tradis	+	+	+	+	+	+	7
PA4559	PA14_60360	lspA	prolipoprotein signal peptidase	Tradis	+	+	+	+	+	+	7
PA5006	PA14_66190	NA	putative kinase	Transit & Tradis	+	+	+	+	+	+	7
PA0330	PA14_04310	rpiA	ribose 5-phosphate isomerase	Tradis	+	+	+	+	+	+	7
PA3653	PA14_17100	frr	ribosome recycling factor	Tradis	+	+	+	+	+	+	7
PA0607	PA14_07910	rpe	ribulose-phosphate 3-epimerase	Tradis	+	+	+	+	+	+	7
PA4403	PA14_57220	secA	secretion protein SecA	Transit & Tradis	+	+	+	+	+	+	7
PA4243	PA14_09050	secY	secretion protein SecY	Transit & Tradis	+	+	+	+	+	+	7
PA4425	PA14_57500	NA	sedoheptulose 7-phosphate isomerase GmhA	Tradis	+	+	+	+	+	+	7
PA2612	PA14_30330	serS	seryl-tRNA synthetase	Transit & Tradis	+	+	+	+	+	+	7
PA0576	PA14_07520	rpoD	sigma factor RpoD	Transit & Tradis	+	+	+	+	+	+	7
PA0768	PA14_54350	lepB	signal peptidase I	Tradis	+	+	+	+	+	+	7
PA1583	PA14_44030	sdhA	succinate dehydrogenase (A subunit)	Transit & Tradis	+	+	+	+	+	+	7
PA1584	PA14_44020	sdhB	succinate dehydrogenase (B subunit)	Tradis	+	+	+	+	+	+	7
PA1581	PA14_44060	sdhC	succinate dehydrogenase (C subunit)	Tradis	+	+	+	+	+	+	7
PA1582	PA14_44050	sdhD	succinate dehydrogenase (D subunit)	Tradis	+	+	+	+	+	+	7
PA2981	PA14_25510	lpxK	tetraacyldisaccharide 4*-kinase	Transit & Tradis	+	+	+	+	+	+	7
PA3666	PA14_16950	dapD	tetrahydrodipicolinate succinylase	Tradis	+	+	+	+	+	+	7
PA2962	PA14_25740	tmk	thymidylate kinase	Tradis	+	+	+	+	+	+	7
PA0972	PA14_51720	tolB	TolB protein	Tradis	+	+	+	+	+	+	7
PA0970	PA14_51740	tolR	TolR protein	Tradis	+	+	+	+	+	+	7
PA4967	PA14_65660	parE	topoisomerase IV subunit B	Transit & Tradis	+	+	+	+	+	+	7
PA0611	PA14_07960	prtR	transcriptional regulator PrtR	Tradis	+	+	+	+	+	+	7
PA0548	PA14_07130	tktA	transketolase	Transit & Tradis	+	+	+	+	+	+	7
PA4744	PA14_62760	infB	translation initiation factor IF-2	Tradis	+	+	+	+	+	+	7
PA2743	PA14_28660	infC	translation initiation factor IF-3	Transit & Tradis	+	+	+	+	+	+	7
PA2626	PA14_30150	trmU	tRNA methyltransferase	Transit & Tradis	+	+	+	+	+	+	7
PA5065	PA14_66920	ubiB	ubiquinone biosynthetic protein UbiB	Transit & Tradis	+	+	+	+	+	+	7
PA4019	PA14_11860	ubiX	UbiX	Tradis	+	+	+	+	+	+	7
PA3646	PA14_17180	lpxD	UDP-3-O-[3-hydroxylauroyl] glucosamine N-acyltransferase	Transit & Tradis	+	+	+	+	+	+	7
PA5010	PA14_66230	waaG	UDP-glucose:(heptosyl) LPS alpha 1,3-glucosyltransferase WaaG	Transit & Tradis	+	+	+	+	+	+	7
PA3644	PA14_17210	lpxA	UDP-N-acetylglucosamine acyltransferase	Tradis	+	+	+	+	+	+	7
PA4411	PA14_57330	murC	UDP-N-acetylmuramate--alanine ligase	Transit & Tradis	+	+	+	+	+	+	7
PA4414	PA14_57370	murD	UDP-N-acetylmuramoylalanine--D-glutamate ligase	Transit & Tradis	+	+	+	+	+	+	7
PA4417	PA14_57410	murE	UDP-N-acetylmuramoylalanyl-D-glutamate-2, 6-diaminopimelate ligase	Transit & Tradis	+	+	+	+	+	+	7
PA4416	PA14_57390	murF	UDP-N-acetylmuramoylalanyl-D-glutamyl-2, 6-diaminopimelate--D-alanyl-D-alanyl ligase	Transit & Tradis	+	+	+	+	+	+	7
PA2977	PA14_25550	murB	UDP-N-acetylpyruvoylglucosamine reductase	Transit & Tradis	+	+	+	+	+	+	7
PA5259	PA14_69440	hemD	uroporphyrinogen-III synthetase	Transit & Tradis	+	+	+	+	+	+	7
PA3834	PA14_14440	valS	valyl-tRNA synthetase	Transit & Tradis	+	+	+	+	+	+	7
PA5008	PA14_66210	wapP	WapP	Transit & Tradis	+	+	+	+	+	+	7
PA4044	PA14_11550	dxs	1-deoxyxylulose-5-phosphate synthase	Transit & Tradis	+	+	+	+	-	+	6
PA4728	PA14_62570	folK	2-amino-4-hydroxy-6-hydroxymethyldihydropteridine pyrophosphokinase	Tradis	+	+	+	+	+	-	6
PA3627	PA14_17420	ygbB	2C-methyl-D-erythritol 2,4-cyclodiphosphate synthase	Tradis	+	+	+	+	-	+	6
PA3636	PA14_17310	kdsA	2-dehydro-3-deoxyphosphooctonate aldolase	Tradis	+	+	+	+	+	-	6
PA4250	PA14_08980	rpsN	30S ribosomal protein S14	Tradis	+	+	-	+	+	+	6
PA3745	PA14_15970	rpsP	30S ribosomal protein S16	Tradis	+	+	-	+	+	+	6
PA4254	PA14_08940	rpsQ	30S ribosomal protein S17	Tradis	+	+	-	+	+	+	6
PA4259	PA14_08890	rpsS	30S ribosomal protein S19	Tradis	+	+	-	+	+	+	6
PA3656	PA14_17060	rpsB	30S ribosomal protein S2	Transit & Tradis	+	+	-	+	+	+	6
PA4239	PA14_09100	rpsD	30S ribosomal protein S4	Transit & Tradis	+	+	+	+	+	-	6
PA4432	PA14_57580	rpsI	30S ribosomal protein S9	Transit & Tradis	+	+	+	+	-	+	6
PA3171	PA14_23220	ubiG	3-demethylubiquinone-9 3-methyltransferase	Tradis	+	+	+	-	+	+	6
PA2967	PA14_25660	fabG	3-oxoacyl-[acyl-carrier-protein] reductase	Tradis	+	+	+	+	-	+	6
PA3633	PA14_17340	ygbP	4-diphosphocytidyl-2-C-methylerythritol synthase	Tradis	+	+	-	+	+	+	6
PA1796	PA14_41350	folD	5,10-methylene-tetrahydrofolate dehydrogenase / cyclohydrolase	Tradis	+	+	+	+	-	+	6
PA4272	PA14_08740	rplJ	50S ribosomal protein L10	Tradis	+	+	+	+	+	-	6
PA4253	PA14_08950	rplN	50S ribosomal protein L14	Tradis	+	+	-	+	+	+	6
PA4237	PA14_09130	rplQ	50S ribosomal protein L17	Tradis	+	+	+	+	-	+	6
PA4247	PA14_09010	rplR	50S ribosomal protein L18	Tradis	+	+	-	+	+	+	6
PA4258	PA14_08900	rplV	50S ribosomal protein L22	Tradis	+	+	-	+	+	+	6
PA4261	PA14_08870	rplW	50S ribosomal protein L23	Tradis	+	+	-	+	+	+	6
PA4252	PA14_08960	rplX	50S ribosomal protein L24	Tradis	+	+	-	+	+	+	6
PA5316	PA14_70190	rpmB	50S ribosomal protein L28	Tradis	+	+	-	+	+	+	6
PA4255	PA14_08930	rpmC	50S ribosomal protein L29	Tradis	+	+	-	+	+	+	6
PA4245	PA14_09030	rpmD	50S ribosomal protein L30	Tradis	+	+	-	+	+	+	6
PA4053	PA14_11430	ribE	6,7-dimethyl-8-ribityllumazine synthase	Tradis	+	+	-	+	+	+	6
PA1787	PA14_41470	acnB	aconitate hydratase 2	Transit & Tradis	+	+	+	+	-	+	6
PA3686	PA14_16700	adk	adenylate kinase	Tradis	+	+	-	+	+	+	6
PA2629	PA14_30110	purB	adenylosuccinate lyase	Transit & Tradis	+	+	+	+	-	+	6
PA4938	PA14_65230	purA	adenylosuccinate synthetase	Transit & Tradis	+	+	+	+	-	+	6
PA0903	PA14_52600	alaS	alanyl-tRNA synthetase	Transit & Tradis	+	+	+	+	-	+	6
PA3984	PA14_12280	lnt	apolipoprotein N-acyltransferase	Transit & Tradis	+	+	+	+	-	+	6
PA0904	PA14_52580	lysC	aspartate kinase alpha and beta chain	Transit & Tradis	+	+	+	+	+	-	6
PA0963	PA14_51820	aspS	aspartyl-tRNA synthetase	Transit & Tradis	+	+	+	+	-	+	6
PA5560	PA14_73310	atpB	ATP synthase A chain	Transit & Tradis	+	+	+	+	+	-	6
PA5558	PA14_73290	atpF	ATP synthase B chain	Tradis	+	+	+	+	+	-	6
PA5553	PA14_73230	atpC	ATP synthase epsilon chain	Tradis	+	+	-	+	+	+	6
PA5555	PA14_73250	atpG	ATP synthase gamma chain	Transit	+	+	+	+	+	-	6
PA1610	PA14_43680	fabA	beta-hydroxydecanoyl-ACP dehydrase	Tradis	+	+	+	+	-	+	6
PA4848	PA14_64110	accC	biotin carboxylase	Transit & Tradis	+	+	+	+	-	+	6
PA2584	PA14_30670	pgsA	CDP-diacylglycerol--glycerol-3-phosphate 3-phosphatidyltransferase	Tradis	+	+	+	+	-	+	6
PA4419	PA14_57440	ftsL	cell division protein FtsL	Transit & Tradis	+	+	-	+	+	+	6
PA4409	PA14_57300	ftsQ	cell division protein FtsQ	Transit & Tradis	+	+	-	+	+	+	6
PA4413	PA14_57360	ftsW	cell division protein FtsW	Transit & Tradis	+	+	+	+	-	+	6
PA4407	PA14_57275	ftsZ	cell division protein FtsZ	Transit & Tradis	+	+	+	+	+	-	6
PA3245	PA14_22010	minE	cell division topological specificity factor MinE	Tradis	+	+	-	+	+	+	6
PA5237	PA14_69150	NA	conserved hypothetical protein	Transit & Tradis	+	+	+	+	-	+	6
PA5568	PA14_73410	NA	conserved hypothetical protein	Transit & Tradis	+	+	+	+	+	-	6
PA0665	PA14_08510	NA	conserved hypothetical protein	Tradis	+	+	+	+	-	+	6
PA2607	PA14_30380	NA	conserved hypothetical protein	Tradis	+	+	-	+	+	+	6
PA2606	PA14_30390	NA	conserved hypothetical protein	Tradis	+	+	-	+	+	+	6
PA2605	PA14_30400	NA	conserved hypothetical protein	Tradis	+	+	+	+	-	+	6
PA0947	PA14_52010	NA	conserved hypothetical protein	Tradis	+	+	+	+	-	+	6
PA0759	PA14_54480	NA	conserved hypothetical protein	Transit & Tradis	+	+	+	+	-	+	6
PA4562	PA14_60390	NA	conserved hypothetical protein	Transit & Tradis	+	+	+	+	-	+	6
PA4998	PA14_66090	NA	conserved hypothetical protein	Tradis	+	+	+	+	-	+	6
PA5492	PA14_72480	NA	conserved hypothetical protein	Tradis	+	+	+	+	-	+	6
PA3163	PA14_23320	cmk	cytidylate kinase	Tradis	+	+	-	+	+	+	6
PA4759	PA14_62940	dapB	dihydrodipicolinate reductase	Transit & Tradis	+	+	+	+	-	+	6
PA4750	PA14_62850	folP	dihydropteroate synthase	Tradis	+	+	+	+	-	+	6
PA1529	PA14_44660	lig	DNA ligase	Transit & Tradis	+	+	+	+	-	+	6
PA0002	PA14_00020	dnaN	DNA polymerase III, beta chain	Transit & Tradis	+	+	+	+	+	-	6
PA3989	PA14_12200	holA	DNA polymerase III, delta subunit	Tradis	+	+	+	+	-	+	6
PA1532	PA14_44630	dnaX	DNA polymerase subunits gamma and tau	Transit & Tradis	+	+	+	+	-	+	6
PA4238	PA14_09115	rpoA	DNA-directed RNA polymerase alpha chain	Transit & Tradis	+	+	+	+	+	-	6
PA4270	PA14_08760	rpoB	DNA-directed RNA polymerase beta chain	Transit & Tradis	+	+	+	+	-	+	6
PA5162	PA14_68190	rmlD	dTDP-4-dehydrorhamnose reductase	Tradis	+	+	+	+	-	+	6
PA3809	PA14_14800	fdx2	ferredoxin [2Fe-2S]	Tradis	+	+	-	+	+	+	6
PA3397	PA14_20140	fprA	FprA	Tradis	+	+	+	+	-	+	6
PA4662	PA14_61660	murI	glutamate racemase	Transit & Tradis	+	+	-	+	+	+	6
PA3977	PA14_12390	hemL	glutamate-1-semialdehyde 2,1-aminomutase	Transit & Tradis	+	+	+	+	-	+	6
PA1794	PA14_41380	glnS	glutaminyl-tRNA synthetase	Transit & Tradis	+	+	+	+	-	+	6
PA4483	PA14_58180	gatA	Glu-tRNA(Gln) amidotransferase subunit A	Transit & Tradis	+	+	+	+	+	-	6
PA4482	PA14_58170	gatC	Glu-tRNA(Gln) amidotransferase subunit C	Tradis	+	+	-	+	+	+	6
PA0009	PA14_00100	glyQ	glycyl-tRNA synthetase alpha chain	Transit & Tradis	+	+	+	+	-	+	6
PA4386	PA14_57020	groES	GroES protein	Tradis	+	+	-	+	+	+	6
PA3810	PA14_14780	hscA	heat shock protein HscA	Transit & Tradis	+	+	+	+	-	+	6
PA3811	PA14_14770	hscB	heat shock protein HscB	Tradis	+	+	+	-	+	+	6
PA0655	PA14_08400	NA	hypothetical protein	Tradis	+	+	+	+	-	+	6
PA4405	PA14_57250	NA	hypothetical protein	Tradis	+	+	+	+	-	+	6
PA4636	PA14_61360	NA	hypothetical protein	Transit & Tradis	+	+	+	+	-	+	6
PA2619	PA14_30240	infA	initiation factor	Tradis	+	+	-	+	+	+	6
PA4031	PA14_11690	ppa	inorganic pyrophosphatase	Tradis	+	+	+	+	-	+	6
PA3770	PA14_15310	guaB	inosine-5'-monophosphate dehydrogenase	Transit & Tradis	+	+	+	+	-	+	6
PA4560	PA14_60370	ileS	isoleucyl-tRNA synthetase	Transit & Tradis	+	+	+	+	-	+	6
PA3814	PA14_14730	iscS	L-cysteine desulfurase (pyridoxal phosphate-dependent)	Transit & Tradis	+	+	+	+	+	-	6
PA3643	PA14_17220	lpxB	lipid A-disaccharide synthase	Transit & Tradis	+	+	+	+	-	+	6
PA3828	PA14_14500	lptF	Lipopolysaccharide export system permease protein LptF	Transit & Tradis	+	+	+	+	+	-	6
PA4459	PA14_57910	lptC	Lipopolysaccharide export system protein LptC	Transit & Tradis	+	+	+	+	+	-	6
PA4996	PA14_66060	rfaE	LPS biosynthesis protein RfaE	Transit & Tradis	+	+	+	+	-	+	6
PA3988	PA14_12210	lptE	LPS-assembly lipoprotein LptE	Tradis	+	+	-	+	+	+	6
PA4557	PA14_60330	lytB	LytB protein	Tradis	+	+	+	+	-	+	6
PA0546	PA14_07090	metK	methionine adenosyltransferase	Transit & Tradis	+	+	-	+	+	+	6
PA0018	PA14_00190	fmt	methionyl-tRNA formyltransferase	Tradis	+	+	+	+	-	+	6
PA4745	PA14_62770	nusA	N utilization substance protein A	Transit & Tradis	+	+	+	+	+	-	6
PA4920	PA14_64980	nadE	NH3-dependent NAD synthetase	Tradis	+	+	+	+	-	+	6
PA4569	PA14_60470	ispB	octaprenyl-diphosphate synthase	Transit & Tradis	+	+	+	+	-	+	6
PA0580	PA14_07570	gcp	O-sialoglycoprotein endopeptidase	Transit & Tradis	+	+	+	+	-	+	6
PA4003	PA14_12060	pbpA	penicillin-binding protein 2	Transit & Tradis	+	+	+	+	+	-	6
PA0594	PA14_07760	surA	peptidyl-prolyl cis-trans isomerase SurA	Transit	+	+	+	+	+	-	6
PA2739	PA14_28710	pheT	phenylalanyl-tRNA synthetase, beta subunit	Transit & Tradis	+	+	+	+	+	-	6
PA3651	PA14_17120	cdsA	phosphatidate cytidylyltransferase	Tradis	+	+	+	+	-	+	6
PA4693	PA14_62120	pssA	phosphatidylserine synthase	Transit & Tradis	+	+	-	+	+	+	6
PA4749	PA14_62840	glmM	phosphoglucosamine mutase	Transit & Tradis	+	+	+	+	-	+	6
PA0363	PA14_04760	coaD	phosphopantetheine adenylyltransferase	Tradis	+	+	+	+	-	+	6
PA5320	PA14_70240	coaC	Phosphopantothenoylcysteine synthase/(R)-4'-phospho-N-pantothenoylcysteine decarboxylase	Tradis	+	+	+	+	-	+	6
PA5260	PA14_69450	hemC	porphobilinogen deaminase	Tradis	+	+	+	+	-	+	6
PA0956	PA14_51900	proS	prolyl-tRNA synthetase	Transit & Tradis	+	+	+	+	-	+	6
PA4055	PA14_11410	ribC	riboflavin synthase alpha chain	Tradis	+	+	-	+	+	+	6
PA4670	PA14_61770	prs	ribose-phosphate pyrophosphokinase	Transit & Tradis	+	+	+	+	-	+	6
PA4002	PA14_12070	rodA	rod shape-determining protein	Transit	+	+	+	+	-	+	6
PA4481	PA14_58150	mreB	rod shape-determining protein MreB	Transit & Tradis	+	+	+	+	-	+	6
PA4480	PA14_58130	mreC	rod shape-determining protein MreC	Transit & Tradis	+	+	+	-	+	+	6
PA4479	PA14_58120	mreD	rod shape-determining protein MreD	Tradis	+	+	+	-	+	+	6
PA3821	PA14_14630	secD	secretion protein SecD	Transit & Tradis	+	+	+	+	+	-	6
PA3820	PA14_14650	secF	secretion protein SecF	Transit & Tradis	+	+	-	+	+	+	6
PA0376	PA14_04930	rpoH	sigma factor RpoH	Tradis	+	+	+	+	-	+	6
PA3746	PA14_15960	ffh	signal recognition particle protein Ffh	Transit & Tradis	+	+	-	+	+	+	6
PA1162	PA14_49380	dapE	succinyl-diaminopimelate desuccinylase	Tradis	+	+	+	+	-	+	6
PA4051	PA14_11460	thiL	thiamine monophosphate kinase	Tradis	+	+	+	+	-	+	6
PA2744	PA14_28650	thrS	threonyl-tRNA synthetase	Transit & Tradis	+	+	+	+	-	+	6
PA0342	PA14_04480	thyA	thymidylate synthase	Transit & Tradis	+	+	+	+	-	+	6
PA0971	PA14_51730	tolA	TolA protein	Transit & Tradis	+	+	+	+	-	+	6
PA0969	PA14_51750	tolQ	TolQ protein	Tradis	+	+	+	+	+	-	6
PA4964	PA14_65605	parC	topoisomerase IV subunit A	Transit & Tradis	+	+	+	+	+	-	6
PA4275	PA14_08710	nusG	transcription antitermination protein NusG	Tradis	+	+	+	+	+	-	6
PA4997	PA14_66080	msbA	transport protein MsbA	Transit & Tradis	+	+	+	+	-	+	6
PA4439	PA14_57670	trpS	tryptophanyl-tRNA synthetase	Transit & Tradis	+	+	+	+	-	+	6
PA5223	PA14_68980	ubiH	ubiH protein	Transit & Tradis	+	+	+	+	+	-	6
PA5063	PA14_66900	ubiE	ubiquinone biosynthesis methyltransferase UbiE	Tradis	+	+	+	+	-	+	6
PA4412	PA14_57340	murG	UDP-N-acetylglucosamine--N-acetylmuramyl-(pentapeptide) pyrophosphoryl-undecaprenol N-acetylglucosamine transferase	Transit & Tradis	+	+	+	-	+	+	6
PA3652	PA14_17110	uppS	undecaprenyl pyrophosphate synthetase	Tradis	+	+	+	-	+	+	6
PA3654	PA14_17080	pyrH	uridylate kinase	Tradis	+	+	+	+	-	+	6
PA5034	PA14_66550	hemE	uroporphyrinogen decarboxylase	Transit & Tradis	+	+	+	+	-	+	6
PA3685	PA14_16710	yeaZ	YeaZ	Tradis	+	+	+	+	-	+	6
PA3162	PA14_23330	rpsA	30S ribosomal protein S1	Transit & Tradis	+	+	+	+	-	-	5
PA4264	PA14_08840	rpsJ	30S ribosomal protein S10	Tradis	+	+	-	+	-	+	5
PA4741	PA14_62720	rpsO	30S ribosomal protein S15	Tradis	+	-	-	+	+	+	5
PA4934	PA14_65170	rpsR	30S ribosomal protein S18	Tradis	+	+	-	+	+	-	5
PA4563	PA14_60400	rpsT	30S ribosomal protein S20	Tradis	+	+	-	+	-	+	5
PA3167	PA14_23270	serC	3-phosphoserine aminotransferase	Transit & Tradis	+	+	+	-	+	-	5
PA5358	PA14_70730	ubiA	4-hydroxybenzoate-octaprenyl transferase	Tradis	+	+	+	+	-	-	5
PA4568	PA14_60460	rplU	50S ribosomal protein L21	Tradis	+	+	-	+	+	-	5
PA4567	PA14_60450	rpmA	50S ribosomal protein L27	Tradis	+	+	-	+	-	+	5
PA4457	PA14_57890	NA	arabinose-5-phosphate isomerase KdsD	Tradis	+	+	+	+	-	-	5
PA5559	PA14_73300	atpE	atp synthase C chain	Tradis	-	+	-	+	+	+	5
PA5174	PA14_68360	fabY	beta-acetoacetyl-acyl carrier protein synthase FabY	Transit	+	+	+	+	-	-	5
PA4752	PA14_62870	ftsJ	cell division protein FtsJ	Tradis	+	+	+	-	+	-	5
PA2615	PA14_30290	ftsK	cell division protein FtsK	Transit & Tradis	+	+	+	+	-	-	5
PA4948	PA14_65380	NA	conserved hypothetical protein	Tradis	+	+	-	-	+	+	5
PA0661	PA14_08470	NA	conserved hypothetical protein	Tradis	+	+	-	+	-	+	5
PA3634	PA14_17330	NA	conserved hypothetical protein	Tradis	+	+	-	+	-	+	5
PA5243	PA14_69240	hemB	delta-aminolevulinic acid dehydratase	Transit & Tradis	+	+	+	+	-	-	5
PA5278	PA14_69690	dapF	diaminopimelate epimerase	Tradis	+	+	+	+	-	-	5
PA2961	PA14_25760	holB	DNA polymerase III, delta prime subunit	Tradis	+	+	-	+	+	-	5
PA3011	PA14_25110	topA	DNA topoisomerase I	Transit	+	+	+	+	-	-	5
PA4269	PA14_08780	rpoC	DNA-directed RNA polymerase beta* chain	Transit & Tradis	+	+	+	+	-	-	5
PA2951	PA14_25880	etfA	electron transfer flavoprotein alpha-subunit	Transit & Tradis	+	+	+	+	-	-	5
PA2953	PA14_25840	NA	electron transfer flavoprotein-ubiquinone oxidoreductase	Transit & Tradis	+	+	+	+	-	-	5
PA4283	PA14_55660	recD	exodeoxyribonuclease V alpha chain	Transit	+	-	-	+	+	+	5
PA2950	PA14_25900	fabV	FabV	Transit & Tradis	+	+	+	-	-	+	5
PA4764	PA14_63020	fur	ferric uptake regulation protein	Tradis	+	+	+	-	-	+	5
PA3111	PA14_23880	folC	folylpolyglutamate synthetase	Transit & Tradis	+	+	-	+	+	-	5
PA5552	PA14_73220	glmU	glucosamine-1-phosphate acetyltransferase/N-acetylglucosamine-1-phosphate uridyltransferase	Tradis	+	+	+	+	-	-	5
PA4666	PA14_61710	hemA	glutamyl-tRNA reductase	Transit & Tradis	+	+	-	+	-	+	5
PA4385	PA14_57010	groEL	GroEL protein	Transit & Tradis	+	+	+	+	-	-	5
PA4047	PA14_11510	ribA	GTP cyclohydrolase II	Tradis	+	+	-	+	-	+	5
PA4762	PA14_62990	grpE	heat shock protein GrpE	Tradis	+	+	-	+	-	+	5
PA1475	PA14_45380	ccmA	heme exporter protein CcmA	Tradis	-	+	+	-	+	+	5
PA5052	PA14_66760	NA	hypothetical protein	Tradis	+	+	-	-	+	+	5
PA3996	PA14_12130	lis	lipoate synthase	Tradis	+	+	-	+	-	+	5
PA1165	PA14_49340	pcpS	PcpS	Tradis	+	+	-	+	-	+	5
PA4418	PA14_57425	ftsI	penicillin-binding protein 3	Transit & Tradis	+	+	+	+	-	-	5
PA4740	PA14_62710	pnp	polyribonucleotide nucleotidyltransferase	Transit	+	+	+	+	-	-	5
PA5050	PA14_66720	priA	primosomal protein N'	Transit	+	+	-	+	-	+	5
PA3812	PA14_14750	iscA	probable iron-binding protein IscA	Tradis	+	+	-	+	-	+	5
PA2798	PA14_27940	NA	probable two-component response regulator	Transit & Tradis	+	+	+	-	+	-	5
PA1049	PA14_50800	pdxH	pyridoxine 5'-phosphate oxidase	Tradis	+	+	-	+	-	+	5
PA4931	PA14_65130	dnaB	replicative DNA helicase	Transit	+	+	+	+	-	-	5
PA4056	PA14_11400	ribD	riboflavin-specific deaminase/reductase	Tradis	+	+	-	+	-	+	5
PA5569	PA14_73420	rnpA	ribonuclease P protein component	Tradis	+	+	+	-	+	-	5
PA4276	PA14_08695	secE	secretion protein SecE	Transit & Tradis	+	+	+	+	-	-	5
PA4747	PA14_62810	secG	secretion protein SecG	Tradis	+	+	-	+	+	-	5
PA4602	PA14_60890	glyA3	serine hydroxymethyltransferase	Transit & Tradis	+	-	+	+	-	+	5
PA0373	PA14_04900	ftsY	signal recognition particle receptor FtsY	Tradis	+	+	-	+	-	+	5
PA5240	PA14_69200	trxA	thioredoxin	Tradis	+	+	-	+	-	+	5
PA4406	PA14_57260	lpxC	UDP-3-O-acyl-N-acetylglucosamine deacetylase	Transit & Tradis	+	+	+	+	-	-	5
PA2966	PA14_25670	acpP	acyl carrier protein	Tradis	-	+	-	+	-	+	4
PA5561	PA14_73320	atpI	ATP synthase protein I	Tradis	+	+	-	-	+	-	4
PA4280	PA14_08620	birA	BirA bifunctional protein	Transit	+	+	-	-	-	+	4
PA1681	PA14_42760	aroC	chorismate synthase	Transit & Tradis	+	+	+	-	-	-	4
PA3998	PA14_12110	NA	conserved hypothetical protein	Tradis	-	+	-	-	+	+	4
PA1564	PA14_44270	NA	conserved hypothetical protein	Tradis	-	+	-	-	+	+	4
PA0006	PA14_00070	NA	conserved hypothetical protein	Transit & Tradis	+	+	+	-	-	-	4
PA1482	PA14_45290	ccmH	cytochrome C-type biogenesis protein CcmH	Tradis	-	-	-	+	+	+	4
PA0577	PA14_07530	dnaG	DNA primase	Transit & Tradis	+	+	+	-	-	-	4
PA1804	PA14_41210	hupB	DNA-binding protein HU	Tradis	-	-	-	+	+	+	4
PA4761	PA14_62970	dnaK	DnaK protein	Transit & Tradis	+	+	+	-	-	-	4
PA3635	PA14_17320	eno	enolase	Transit & Tradis	+	-	-	+	-	+	4
PA3584	PA14_17930	glpD	glycerol-3-phosphate dehydrogenase	Transit & Tradis	+	+	-	-	+	-	4
PA1476	PA14_45370	ccmB	heme exporter protein CcmB	Tradis	+	-	-	+	+	-	4
PA4944	PA14_65310	hfq	Hfq	Tradis	+	-	-	-	+	+	4
PA5064	PA14_66910	NA	hypothetical protein	Tradis	+	-	-	-	+	+	4
PA1478	PA14_45340	NA	hypothetical protein	Tradis	-	+	-	-	+	+	4
PA2797	PA14_27950	NA	hypothetical protein	Tradis	+	+	-	-	+	-	4
PA0595	PA14_07770	lptD	LPS-assembly protein LptD	Tradis	+	+	-	+	-	-	4
PA0427	PA14_05550	oprM	Major intrinsic multiple antibiotic resistance efflux outer membrane protein OprM precursor	Transit & Tradis	+	-	-	+	+	-	4
PA2968	PA14_25650	fabD	malonyl-CoA-[acyl-carrier-protein] transacylase	Tradis	+	+	-	+	-	-	4
PA4947	PA14_65370	amiB	N-acetylmuramoyl-L-alanine amidase	Transit & Tradis	+	+	-	-	-	+	4
PA4464	PA14_57960	ptsN	nitrogen regulatory IIA protein	Tradis	+	-	-	-	+	+	4
PA4057	PA14_11380	nrdR	NrdR	Tradis	+	-	-	-	+	+	4
PA0973	PA14_51710	oprL	Peptidoglycan associated lipoprotein OprL precursor	Transit & Tradis	+	+	-	+	-	-	4
PA0552	PA14_07190	pgk	phosphoglycerate kinase	Transit & Tradis	+	-	-	-	+	+	4
PA2329	PA14_34500	NA	probable ATP-binding component of ABC transporter	Tradis	+	-	-	-	+	+	4
PA4333	PA14_56300	NA	probable fumarase	Transit	+	+	+	-	-	-	4
PA3001	PA14_25250	NA	probable glyceraldehyde-3-phosphate dehydrogenase	Transit & Tradis	+	-	-	+	-	+	4
PA0593	PA14_07740	pdxA	pyridoxal phosphate biosynthetic protein PdxA	Transit & Tradis	+	+	+	-	-	-	4
PA0773	PA14_54290	pdxJ	pyridoxal phosphate biosynthetic protein PdxJ	Tradis	+	+	+	-	-	-	4
PA0770	PA14_54330	rnc	ribonuclease III	Tradis	+	+	-	-	+	-	4
PA1979	PA14_38910	eraS	sensor kinase, EraS	Tradis	+	-	-	-	+	+	4
PA0025	PA14_00290	aroE	shikimate dehydrogenase	Tradis	+	-	-	-	+	+	4
PA5039	PA14_66610	aroK	shikimate kinase	Tradis	+	-	-	+	-	+	4
PA4232	PA14_09200	ssb	single-stranded DNA-binding protein	Tradis	+	+	-	+	-	-	4
PA4748	PA14_62830	tpiA	triosephosphate isomerase	Tradis	-	+	+	-	+	-	4
PA1718	PA14_42320	pscE	type III export protein PscE	Tradis	-	+	-	-	+	+	4
PA3159	PA14_23380	wbpA	UDP-N-acetyl-d-glucosamine 6-Dehydrogenase	Tradis	+	+	+	-	-	-	4
PA5038	PA14_66600	aroB	3-dehydroquinate synthase	Transit & Tradis	+	-	-	-	+	-	3
PA2061	PA14_37840	sppD	ABC transporter ATP-binding protein, SppD	Transit	-	-	-	-	+	+	3
PA3557	PA14_18320	arnE	ArnE	Tradis	-	-	-	-	+	+	3
PA3244	PA14_22020	minD	cell division inhibitor MinD	Transit & Tradis	+	-	-	-	+	-	3
PA4545	PA14_60230	comL	competence protein ComL	Transit	+	+	-	-	-	-	3
PA0380	PA14_04970	NA	conserved hypothetical protein	Tradis	-	-	-	-	+	+	3
PA4149	PA14_10270	NA	conserved hypothetical protein	Tradis	-	-	-	-	+	+	3
PA2346	PA14_34320	NA	conserved hypothetical protein	Transit	+	-	-	-	-	+	3
PA2148	PA14_36780	NA	conserved hypothetical protein	Tradis	+	-	-	-	-	+	3
PA1849	PA14_40610	NA	conserved hypothetical protein	Tradis	-	-	-	-	+	+	3
PA1042	PA14_50870	NA	conserved hypothetical protein	Tradis	+	-	-	-	-	+	3
PA4387	PA14_57030	NA	conserved hypothetical protein	Tradis	+	-	-	-	-	+	3
PA2980	PA14_25520	NA	conserved hypothetical protein	Tradis	+	-	-	-	-	+	3
PA4940	PA14_65260	NA	conserved hypothetical protein	Tradis	-	-	-	-	+	+	3
PA4285	PA14_55690	recC	exodeoxyribonuclease V gamma chain	Transit	+	-	-	-	-	+	3
PA1711	PA14_42410	exsE	ExsE	Tradis	-	-	-	-	+	+	3
PA3014	PA14_25080	faoA	fatty-acid oxidation complex alpha-subunit	Transit & Tradis	+	-	-	-	+	-	3
PA3013	PA14_25090	faoB	fatty-acid oxidation complex beta-subunit	Transit & Tradis	+	-	-	-	+	-	3
PA1176	PA14_49220	napF	ferredoxin protein NapF	Tradis	-	-	-	-	+	+	3
PA2408	PA14_33550	fpvD	FpvD	Tradis	-	-	-	-	+	+	3
PA3099	PA14_24050	xcpV	general secretion pathway protein I	Tradis	-	-	-	-	+	+	3
PA4566	PA14_60445	obg	GTP-binding protein Obg	Transit & Tradis	+	+	-	-	-	-	3
PA1477	PA14_45350	ccmC	heme exporter protein CcmC	Transit & Tradis	-	-	-	-	+	+	3
PA0068	PA14_00800	NA	hypothetical protein	Tradis	-	-	-	-	+	+	3
PA3971	PA14_12470	NA	hypothetical protein	Tradis	-	-	-	-	+	+	3
PA3425	PA14_19750	NA	hypothetical protein	Tradis	-	-	-	+	-	+	3
PA3072	PA14_24410	NA	hypothetical protein	Tradis	-	-	-	-	+	+	3
PA2916	PA14_26340	NA	hypothetical protein	Tradis	-	-	-	-	+	+	3
PA2161	PA14_36620	NA	hypothetical protein	Tradis	-	-	-	-	+	+	3
PA2137	PA14_36920	NA	hypothetical protein	Tradis	-	-	-	-	+	+	3
PA2111	PA14_37290	NA	hypothetical protein	Tradis	-	-	-	+	-	+	3
PA2090	PA14_37470	NA	hypothetical protein	Tradis	-	-	-	-	+	+	3
PA1133	PA14_49730	NA	hypothetical protein	Tradis	+	-	-	-	-	+	3
PA0802	PA14_53870	NA	hypothetical protein	Tradis	-	-	-	-	+	+	3
PA0734	PA14_54790	NA	hypothetical protein	Tradis	-	-	-	-	+	+	3
PA4795	PA14_63360	NA	hypothetical protein	Tradis	-	-	-	-	+	+	3
PA4961	PA14_65570	NA	hypothetical protein	Transit & Tradis	+	-	-	-	-	+	3
PA3786	PA14_15110	NA	hypothetical protein	Tradis	+	-	-	-	-	+	3
PA3572	PA14_18100	NA	hypothetical protein	Tradis	+	-	-	-	-	+	3
PA1981	PA14_38880	NA	hypothetical protein	Tradis	-	-	-	-	+	+	3
PA1228	PA14_48400	NA	hypothetical protein	Tradis	-	-	-	-	+	+	3
PA4826	PA14_63820	NA	hypothetical protein	Tradis	-	-	-	-	+	+	3
PA5126	PA14_67700	NA	hypothetical protein	Tradis	+	-	-	-	-	+	3
PA4685	PA14_61980	NA	hypothetical protein	Tradis	-	+	+	-	-	-	3
PA0442	PA14_05775	NA	hypothetical protein	Tradis	+	+	-	-	-	-	3
PA5276	PA14_69660	lppL	Lipopeptide LppL precursor	Tradis	-	+	-	-	-	+	3
PA3150	#N/A	wbpG	LPS biosynthesis protein WbpG	Tradis	-	+	+	-	-	-	3
PA0210	PA14_02570	mdcC	malonate decarboxylase delta subunit	Tradis	-	-	-	-	+	+	3
PA3482	PA14_19050	metG	methionyl-tRNA synthetase	Transit & Tradis	+	+	-	-	-	-	3
PA4663	PA14_61670	moeB	molybdopterin biosynthesis MoeB protein	Tradis	+	-	-	-	-	+	3
PA3141	PA14_23470	wbpM	nucleotide sugar epimerase/dehydratase WbpM	Transit & Tradis	-	+	+	-	-	-	3
PA1700	PA14_42530	pcr2	Pcr2	Tradis	-	-	-	-	+	+	3
PA5131	PA14_67770	pgm	phosphoglycerate mutase	Transit	+	-	-	+	-	-	3
PA2553	PA14_31530	NA	probable acyl-CoA thiolase	Tradis	-	-	-	-	+	+	3
PA5005	PA14_66170	NA	probable carbamoyl transferase	Transit	+	-	-	-	+	-	3
PA3147	#N/A	wbpJ	probable glycosyl transferase WbpJ	Tradis	-	+	+	-	-	-	3
PA3149	#N/A	wbpH	probable glycosyltransferase WbpH	Tradis	-	+	+	-	-	-	3
PA3703	#N/A	wspF	probable methylesterase	Transit & Tradis	-	+	+	-	-	-	3
PA3146	PA14_23450	wbpK	probable NAD-dependent epimerase/dehydratase WbpK	Transit & Tradis	+	+	-	-	-	-	3
PA3647	PA14_17170	NA	probable outer membrane protein precursor	Tradis	-	-	-	+	+	-	3
PA4558	PA14_60350	NA	probable peptidyl-prolyl cis-trans isomerase, FkbP-type	Tradis	-	-	-	-	+	+	3
PA2376	PA14_33920	NA	probable transcriptional regulator	Tradis	+	-	-	-	-	+	3
PA2480	PA14_32570	NA	probable two-component sensor	Tradis	-	-	-	-	+	+	3
PA2241	PA14_35620	pslK	PslL	Transit & Tradis	-	-	-	-	+	+	3
PA2019	PA14_38395	mexX	Resistance-Nodulation-Cell Division (RND) multidrug efflux membrane fusion protein MexX precursor	Transit & Tradis	+	-	-	-	+	-	3
PA0426	PA14_05540	mexB	Resistance-Nodulation-Cell Division (RND) multidrug efflux transporter MexB	Transit & Tradis	-	-	-	+	+	-	3
PA5337	PA14_70450	rpoZ	RNA polymerase omega subunit	Tradis	-	-	-	-	+	+	3
PA4807	PA14_63530	selB	selenocysteine-specific elongation factor	Transit	-	-	-	-	+	+	3
PA5531	PA14_72970	tonB1	TonB1	Tradis	+	+	-	-	-	-	3
PA0197	PA14_02490	tonB2	TonB2	Tradis	-	-	-	-	+	+	3
PA4600	PA14_60860	nfxB	transcriptional regulator NfxB	Tradis	+	-	-	-	+	-	3
PA1696	PA14_42580	pscO	translocation protein in type III secretion	Tradis	-	-	-	-	+	+	3
PA3743	PA14_15990	trmD	tRNA (guanine-N1)-methyltransferase	Tradis	+	-	-	-	+	-	3
PA3879	PA14_13730	narL	two-component response regulator NarL	Tradis	-	-	-	-	+	+	3
PA1715	PA14_42360	pscB	type III export apparatus protein	Tradis	-	-	-	-	+	+	3
PA3158	#N/A	wbpB	UDP-2-acetamido-2-deoxy-d-glucuronic acid 3-dehydrogenase, WbpB	Tradis	-	+	+	-	-	-	3
PA3155	#N/A	wbpE	UDP-2-acetamido-2-dideoxy-d-ribo-hex-3-uluronic acid transaminase, wbpE	Tradis	-	+	+	-	-	-	3
PA3156	#N/A	wbpD	UDP-2-acetamido-3-amino-2,3-dideoxy-d-glucuronic acid N-acetyltransferase, WbpD	Tradis	-	+	+	-	-	-	3
PA3148	#N/A	wbpI	UDP-N-acetylglucosamine 2-epimerase WbpI	Tradis	-	+	+	-	-	-	3
PA3561	PA14_18260	fruK	1-phosphofructokinase	Tradis	-	-	-	-	+	-	2
PA3181	PA14_23090	NA	2-keto-3-deoxy-6-phosphogluconate aldolase	Tradis	-	-	-	-	+	-	2
PA5315	PA14_70180	rpmG	50S ribosomal protein L33	Tradis	-	+	-	-	-	-	2
PA5570	#N/A	rpmH	50S ribosomal protein L34	Tradis	NA	+	-	NA	NA	NA	2
PA4242	PA14_09070	rpmJ	50S ribosomal protein L36	Tradis	-	+	-	-	-	-	2
PA5199	PA14_68680	amgS	AmgS	Tradis	-	-	-	-	+	-	2
PA2249	PA14_35500	bkdB	branched-chain alpha-keto acid dehydrogenase (lipoamide component)	Tradis	-	-	-	-	-	+	2
PA3243	PA14_22040	minC	cell division inhibitor MinC	Tradis	+	-	-	-	-	-	2
PA1277	PA14_47690	cobQ	cobyric acid synthase	Transit & Tradis	-	-	-	-	-	+	2
PA0209	PA14_02560	NA	conserved hypothetical protein	Tradis	-	-	-	-	-	+	2
PA0542	PA14_07040	NA	conserved hypothetical protein	Tradis	-	-	-	-	-	+	2
PA3379	PA14_20370	NA	conserved hypothetical protein	Tradis	-	-	-	-	-	+	2
PA2910	PA14_26450	NA	conserved hypothetical protein	Tradis	-	-	-	-	-	+	2
PA2159	PA14_36650	NA	conserved hypothetical protein	Tradis	-	-	-	-	-	+	2
PA2146	PA14_36820	NA	conserved hypothetical protein	Tradis	-	-	-	-	-	+	2
PA2116	PA14_37210	NA	conserved hypothetical protein	Tradis	-	-	-	-	-	+	2
PA1616	PA14_43620	NA	conserved hypothetical protein	Tradis	-	-	-	-	-	+	2
PA1298	PA14_47420	NA	conserved hypothetical protein	Tradis	-	-	-	-	-	+	2
PA4357	PA14_56670	NA	conserved hypothetical protein	Tradis	-	-	-	-	-	+	2
PA2156	PA14_36680	NA	conserved hypothetical protein	Tradis	-	-	+	-	-	-	2
PA1479	PA14_45330	ccmE	cytochrome C-type biogenesis protein CcmE	Tradis	-	-	-	-	+	-	2
PA1100	PA14_50160	fliE	flagellar hook-basal body complex protein FliE	Tradis	-	-	-	-	-	+	2
PA2405	PA14_33580	fpvJ	FpvJ	Tradis	-	-	-	-	+	-	2
PA0033	PA14_00420	hptC	Histidine phosphotransfer protein HptC	Tradis	-	-	-	-	-	+	2
PA0200	PA14_02520	NA	hypothetical protein	Tradis	-	-	-	-	-	+	2
PA4164	PA14_10020	NA	hypothetical protein	Tradis	-	-	-	-	-	+	2
PA4139	PA14_10380	NA	hypothetical protein	Tradis	-	-	-	-	-	+	2
PA4046	PA14_11520	NA	hypothetical protein	Tradis	-	-	-	-	-	+	2
PA3791	PA14_15050	NA	hypothetical protein	Tradis	-	-	-	-	-	+	2
PA3536	PA14_18620	NA	hypothetical protein	Tradis	-	-	-	-	-	+	2
PA2898	PA14_26580	NA	hypothetical protein	Tradis	-	-	-	-	-	+	2
PA2868	PA14_26990	NA	hypothetical protein	Tradis	-	-	-	-	-	+	2
PA2805	PA14_27870	NA	hypothetical protein	Tradis	-	-	-	-	-	+	2
PA2464	PA14_32770	NA	hypothetical protein	Tradis	-	-	-	-	-	+	2
PA2437	PA14_33110	NA	hypothetical protein	Tradis	-	-	-	-	-	+	2
PA2375	PA14_33930	NA	hypothetical protein	Tradis	-	-	-	-	-	+	2
PA2134	PA14_36980	NA	hypothetical protein	Tradis	-	-	-	-	-	+	2
PA2031	PA14_38260	NA	hypothetical protein	Tradis	-	-	-	-	-	+	2
PA1929	PA14_39570	NA	hypothetical protein	Tradis	-	-	-	-	-	+	2
PA1855	PA14_40520	NA	hypothetical protein	Tradis	-	-	-	-	-	+	2
PA1503	PA14_44990	NA	hypothetical protein	Tradis	-	-	-	-	-	+	2
PA1474	PA14_45400	NA	hypothetical protein	Tradis	-	-	-	-	-	+	2
PA1280	PA14_47660	NA	hypothetical protein	Tradis	-	-	-	-	-	+	2
PA1233	PA14_48330	NA	hypothetical protein	Tradis	-	-	-	-	-	+	2
PA4531	PA14_58800	NA	hypothetical protein	Tradis	-	-	-	-	-	+	2
PA4623	PA14_61180	NA	hypothetical protein	Tradis	-	-	-	-	-	+	2
PA4894	PA14_64680	NA	hypothetical protein	Tradis	-	-	-	-	-	+	2
PA5381	PA14_71080	NA	hypothetical protein	Tradis	-	-	-	-	-	+	2
PA5406	PA14_71360	NA	hypothetical protein	Tradis	-	-	-	-	-	+	2
PA1874	PA14_40260	NA	hypothetical protein	Transit	-	-	-	-	+	-	2
PA2141	PA14_36880	NA	hypothetical protein	Tradis	-	-	-	-	+	-	2
PA2330	PA14_34490	NA	hypothetical protein	Tradis	-	-	-	-	+	-	2
PA3796	PA14_14975	NA	hypothetical protein	Tradis	-	-	-	-	+	-	2
PA2311	PA14_34740	NA	hypothetical protein	Tradis	-	-	-	-	-	+	2
PA2136	PA14_36930	NA	hypothetical protein	Tradis	-	-	-	-	-	+	2
PA1966	PA14_39100	NA	hypothetical protein	Tradis	-	-	-	-	-	+	2
PA1924	PA14_39630	NA	hypothetical protein	Tradis	-	-	-	-	-	+	2
PA1620	PA14_43570	NA	hypothetical protein	Tradis	-	-	-	-	-	+	2
PA1394	PA14_46390	NA	hypothetical protein	Tradis	-	-	-	-	-	+	2
PA2245	PA14_35550	pslO	hypothetical protein	Tradis	-	-	-	-	+	-	2
PA2139	#N/A	NA	hypothetical protein	Tradis	NA	+	-	NA	NA	NA	2
PA3161	PA14_23340	himD	integration host factor beta subunit	Tradis	-	-	-	-	-	+	2
PA2508	PA14_32230	catC	muconolactone delta-isomerase	Tradis	-	-	-	-	-	+	2
PA1279	PA14_47670	cobU	nicotinate-nucleotide--dimethylbenzimidazole phosphoribosyltransferase	Tradis	-	-	-	-	+	-	2
PA2876	PA14_26890	pyrF	orotidine 5'-phosphate decarboxylase	Tradis	-	-	-	-	+	-	2
PA4176	PA14_09890	ppiC2	peptidyl-prolyl cis-trans isomerase C2	Tradis	-	-	-	-	-	+	2
PA5365	PA14_70800	phoU	phosphate uptake regulatory protein PhoU	Tradis	-	-	-	+	-	-	2
PA3194	PA14_22910	edd	phosphogluconate dehydratase	Tradis	-	-	-	-	+	-	2
PA0743	PA14_54670	NA	probable 3-hydroxyisobutyrate dehydrogenase	Tradis	-	-	-	-	-	+	2
PA0417	PA14_05430	chpE	probable chemotaxis protein	Tradis	-	-	-	-	-	+	2
PA1159	PA14_49410	NA	probable cold-shock protein	Tradis	-	-	-	-	-	+	2
PA3591	PA14_17850	NA	probable enoyl-CoA hydratase/isomerase	Tradis	-	-	-	-	-	+	2
PA4980	PA14_65840	NA	probable enoyl-CoA hydratase/isomerase	Tradis	-	-	-	-	-	+	2
PA2098	PA14_37370	NA	probable esterase/deacetylase	Tradis	-	-	-	-	+	-	2
PA2140	PA14_36890	NA	probable metallothionein	Tradis	-	-	-	-	+	-	2
PA3441	PA14_19590	NA	probable molybdopterin-binding protein	Tradis	-	-	-	-	-	+	2
PA5470	PA14_72200	NA	probable peptide chain release factor	Tradis	-	-	-	-	+	-	2
PA0489	PA14_06360	NA	probable phosphoribosyl transferase	Tradis	-	-	-	-	-	+	2
PA2554	PA14_31510	NA	probable short-chain dehydrogenase	Tradis	-	-	-	-	-	+	2
PA3883	PA14_13680	NA	probable short-chain dehydrogenase	Tradis	-	-	-	-	-	+	2
PA1884	PA14_40150	NA	probable transcriptional regulator	Tradis	-	-	-	-	-	+	2
PA3264	PA14_21780	NA	probable transporter	Tradis	-	-	-	-	-	+	2
PA2890	PA14_26690	atuE	putative isohexenylglutaconyl-CoA hydratase	Tradis	-	-	-	-	+	-	2
PA1151	#N/A	imm2	pyocin S2 immunity protein	Transit & Tradis	NA	+	-	NA	NA	NA	2
PA1988	PA14_38790	pqqD	pyrroloquinoline quinone biosynthesis protein D	Tradis	-	-	-	-	-	+	2
PA0425	PA14_05530	mexA	Resistance-Nodulation-Cell Division (RND) multidrug efflux membrane fusion protein MexA precursor	Transit & Tradis	-	-	-	+	-	-	2
PA2018	PA14_38410	mexY	Resistance-Nodulation-Cell Division (RND) multidrug efflux transporter MexY	Transit & Tradis	+	-	-	-	-	-	2
PA0814	PA14_53740	NA	Rid1 subfamily protein	Tradis	-	-	-	-	-	+	2
PA3242	PA14_22050	htrB2	temperature-regulated acyltransferase HtrB1	Transit & Tradis	+	-	-	-	-	-	2
PA0092	PA14_01120	tsi6	Tsi6	Tradis	-	+	-	-	-	-	2
PA1720	PA14_42300	pscG	type III export protein PscG	Tradis	-	-	-	-	-	+	2
PA4865	PA14_64350	ureA	urease gamma subunit	Tradis	-	-	-	-	-	+	2
PA2343	PA14_34350	mtlY	xylulose kinase	Transit & Tradis	-	-	-	-	-	+	2
PA0910	PA14_52490	alpD	autolysis protein	Tradis	-	-	-	-	-	-	1
PA4119	PA14_10670	aph	aminoglycoside 3'-phosphotransferase type IIb	Tradis	-	-	-	-	-	-	1
PA2279	PA14_35130	arsC	ArsC protein	Tradis	-	-	-	-	-	-	1
PA5562	PA14_73330	spoOJ	chromosome partitioning protein Spo0J	Tradis	-	-	-	-	-	-	1
PA0741	PA14_54690	NA	conserved hypothetical protein	Tradis	-	-	-	-	-	-	1
PA1052	PA14_50760	NA	conserved hypothetical protein	Tradis	-	-	-	-	-	-	1
PA3208	PA14_22710	NA	conserved hypothetical protein	Tradis	-	-	-	-	-	-	1
PA1774	PA14_41610	crfX	CrfX protein	Tradis	-	-	-	-	-	-	1
PA1552.1	#N/A	ccoQ1	Cytochrome c oxidase, cbb3-type, CcoQ subunit	Tradis	NA	-	-	NA	NA	NA	1
PA1555.1	#N/A	ccoQ2	Cytochrome c oxidase, cbb3-type, CcoQ subunit	Tradis	NA	-	-	NA	NA	NA	1
PA4945	PA14_65320	miaA	delta 2-isopentenylpyrophosphate transferase	Transit & Tradis	-	-	-	-	-	-	1
PA1266	PA14_47860	lhpE	D-hydroxyproline dehydrogenase alpha-subunit, LphE	Transit & Tradis	-	-	-	-	-	-	1		carbon metabolism
PA1266.1	#N/A	lhpF	D-hydroxyproline dehydrogenase gamma-subunit, LphF	Tradis	NA	-	-	NA	NA	NA	1		carbon metabolism
PA4226	PA14_09270	pchE	dihydroaeruginoic acid synthetase	Transit	-	-	-	-	-	-	1
PA5493	PA14_72490	polA	DNA polymerase I	Transit	-	-	-	-	-	-	1
PA1976	PA14_38970	ercS'	ErcS'	Transit	-	-	-	-	-	-	1
PA4158	PA14_10180	fepC	ferric enterobactin transport protein FepC	Tradis	-	-	-	-	-	-	1
PA2344	PA14_34340	mtlZ	fructokinase	Tradis	-	-	-	-	-	-	1
PA2445	PA14_33000	gcvP2	glycine cleavage system protein P2	Transit	-	-	-	-	-	-	1
PA3409	PA14_20000	hasS	HasS	Tradis	-	-	-	-	-	-	1
PA0344	PA14_04510	NA	hypothetical protein	Transit & Tradis	-	-	-	-	-	-	1
PA0474	PA14_06200	NA	hypothetical protein	Tradis	-	-	-	-	-	-	1
PA0553	PA14_07200	NA	hypothetical protein	Tradis	-	-	-	-	-	-	1
PA1045	PA14_50840	NA	hypothetical protein	Transit	-	-	-	-	-	-	1
PA1263	PA14_47890	NA	hypothetical protein	Transit & Tradis	-	-	-	-	-	-	1
PA1270	PA14_47810	NA	hypothetical protein	Transit	-	-	-	-	-	-	1
PA2163	PA14_36590	NA	hypothetical protein	Transit	-	-	-	-	-	-	1
PA2243	PA14_35590	pslM	hypothetical protein	Transit	-	-	-	-	-	-	1
PA2285	PA14_35030	NA	hypothetical protein	Tradis	-	-	-	-	-	-	1
PA2658	PA14_29720	NA	hypothetical protein	Tradis	-	-	-	-	-	-	1
PA2901	PA14_26550	NA	hypothetical protein	Tradis	-	-	-	-	-	-	1
PA2909	PA14_26460	NA	hypothetical protein	Tradis	-	-	-	-	-	-	1
PA3110	PA14_23890	NA	hypothetical protein	Tradis	-	-	-	-	-	-	1
PA3197	PA14_22860	NA	hypothetical protein	Tradis	-	-	-	-	-	-	1
PA3941	PA14_12890	NA	hypothetical protein	Tradis	-	-	-	-	-	-	1
PA3952	PA14_12740	NA	hypothetical protein	Tradis	-	-	-	-	-	-	1
PA4059	PA14_11350	NA	hypothetical protein	Tradis	-	-	-	-	-	-	1
PA5144	PA14_67940	NA	hypothetical protein	Tradis	-	-	-	-	-	-	1
PA5391	PA14_71190	NA	hypothetical protein	Tradis	-	-	-	-	-	-	1
PA2436	PA14_33120	NA	hypothetical protein	Tradis	-	-	-	-	-	-	1
PA2461	#N/A	NA	hypothetical protein	Tradis	NA	-	-	NA	NA	NA	1
PA2779	PA14_28140	NA	hypothetical protein	Tradis	-	-	-	-	-	-	1
PA3231	PA14_22400	NA	hypothetical protein	Tradis	-	-	-	-	-	-	1
PA3788	PA14_15090	NA	hypothetical protein	Tradis	-	-	-	-	-	-	1
PA4028	#N/A	NA	hypothetical protein	Tradis	NA	-	-	NA	NA	NA	1
PA4146	#N/A	NA	hypothetical protein	Tradis	NA	-	-	NA	NA	NA	1
PA4823	PA14_63770	NA	hypothetical protein	Tradis	-	-	-	-	-	-	1
PA1803	PA14_41220	lon	Lon protease	Transit	-	-	-	-	-	-	1
PA2206	PA14_36180	NA	LysR-type transcriptional regulator	Tradis	-	-	-	-	-	-	1
PA5003	PA14_66150	NA	Mig-14-like protein	Transit & Tradis	-	-	-	-	-	-	1
PA2138	PA14_36910	ligD	Multifunctional non-homologous end joining protein LigD	Transit	-	-	-	-	-	-	1
PA4406.1	#N/A	NA	NA	Tradis	NA	-	-	NA	NA	NA	1
PA5316.1	#N/A	NA	NA	Tradis	NA	-	-	NA	NA	NA	1
PA0401	PA14_05250	NA	noncatalytic dihydroorotase-like protein	Transit	-	-	-	-	-	-	1
PA3304.1	#N/A	P18	P18	Tradis	NA	-	-	NA	NA	NA	1
PA4270.1	#N/A	P26	P26	Tradis	NA	-	-	NA	NA	NA	1
PA1996	PA14_38700	ppiC1	peptidyl-prolyl cis-trans isomerase C1	Tradis	-	-	-	-	-	-	1
PA1177	PA14_49210	napE	periplasmic nitrate reductase protein NapE	Tradis	-	-	-	-	-	-	1
PA0316	PA14_04110	serA	D-3-phosphoglycerate dehydrogenase	Transit & Tradis	-	-	-	-	-	-	1
PA4222	PA14_09320	NA	probable ATP-binding component of ABC transporter	Tradis	-	-	-	-	-	-	1
PA0415	PA14_05410	chpC	probable chemotaxis protein	Tradis	-	-	-	-	-	-	1
PA3509	#N/A	NA	probable hydrolase	Tradis	NA	-	-	NA	NA	NA	1
PA1615	PA14_43630	NA	probable lipase	Tradis	-	-	-	-	-	-	1
PA1908	PA14_39850	NA	probable major facilitator superfamily (MFS) transporter	Tradis	-	-	-	-	-	-	1
PA3404	PA14_20050	NA	probable outer membrane protein precursor	Transit	-	-	-	-	-	-	1
PA4960	PA14_65560	NA	probable phosphoserine phosphatase	Transit	-	-	-	-	-	-	1
PA2316	PA14_34690	NA	probable transcriptional regulator	Tradis	-	-	-	-	-	-	1
PA2334	PA14_02390	NA	probable transcriptional regulator	Tradis	-	-	-	-	-	-	1
PA3067	#N/A	NA	probable transcriptional regulator	Tradis	NA	-	-	NA	NA	NA	1
PA3420	PA14_19850	NA	probable transcriptional regulator	Transit	-	-	-	-	-	-	1
PA4895	PA14_64690	NA	probable transmembrane sensor	Tradis	-	-	-	-	-	-	1
PA1650	PA14_43170	NA	probable transporter	Tradis	-	-	-	-	-	-	1
PA4225	PA14_09280	pchF	pyochelin synthetase	Transit	-	-	-	-	-	-	1
PA1980	PA14_38900	eraR	response regulator EraR	Tradis	-	-	-	-	-	-	1
PA4421.1	#N/A	rnpB	RNA component of RNaseP, RnpB	Tradis	NA	-	-	NA	NA	NA	1
PA0074	PA14_00875	ppkA	serine/threonine protein kinase PpkA	Transit	-	-	-	-	-	-	1
PA5285	PA14_69770	sutA	SutA	Tradis	-	-	-	-	-	-	1
PA3133.4	#N/A	NA	tRNA-Ala	Tradis	NA	-	-	NA	NA	NA	1
PA0263.1	#N/A	NA	tRNA-Arg	Tradis	NA	-	-	NA	NA	NA	1
PA0905.2	#N/A	NA	tRNA-Arg	Tradis	NA	-	-	NA	NA	NA	1
PA1796.1	#N/A	NA	tRNA-Arg	Tradis	NA	-	-	NA	NA	NA	1
PA1804.1	#N/A	NA	tRNA-Asp	Tradis	NA	-	-	NA	NA	NA	1
PA2581.1	#N/A	NA	tRNA-Cys	Tradis	NA	-	-	NA	NA	NA	1
PA4669.1	#N/A	NA	tRNA-Gln	Tradis	NA	-	-	NA	NA	NA	1
PA3133.3	#N/A	NA	tRNA-Glu	Tradis	NA	-	-	NA	NA	NA	1
PA4277.2	#N/A	NA	tRNA-Gly	Tradis	NA	-	-	NA	NA	NA	1
PA1796.2	#N/A	NA	tRNA-His	Tradis	NA	-	-	NA	NA	NA	1
PA1796.3	#N/A	NA	tRNA-Leu	Tradis	NA	-	-	NA	NA	NA	1
PA2570.1	#N/A	NA	tRNA-Leu	Tradis	NA	-	-	NA	NA	NA	1
PA3824.1	#N/A	NA	tRNA-Leu	Tradis	NA	-	-	NA	NA	NA	1
PA4746.2	#N/A	NA	tRNA-Leu	Tradis	NA	-	-	NA	NA	NA	1
PA4937.1	#N/A	NA	tRNA-Leu	Tradis	NA	-	-	NA	NA	NA	1
PA0574.1	#N/A	NA	tRNA-Met	Tradis	NA	-	-	NA	NA	NA	1
PA4673.1	#N/A	NA	tRNA-Met	Tradis	NA	-	-	NA	NA	NA	1
PA5149.1	#N/A	NA	tRNA-Phe	Tradis	NA	-	-	NA	NA	NA	1
PA2736.1	#N/A	NA	tRNA-Pro	Tradis	NA	-	-	NA	NA	NA	1
PA3031.1	#N/A	NA	tRNA-Pro	Tradis	NA	-	-	NA	NA	NA	1
PA4541.2	#N/A	NA	tRNA-Pro	Tradis	NA	-	-	NA	NA	NA	1
PA0905.1	#N/A	NA	tRNA-Ser	Tradis	NA	-	-	NA	NA	NA	1
PA1013.1	#N/A	NA	tRNA-Ser	Tradis	NA	-	-	NA	NA	NA	1
PA2603.1	#N/A	NA	tRNA-Ser	Tradis	NA	-	-	NA	NA	NA	1
PA2852.1	#N/A	NA	tRNA-Ser	Tradis	NA	-	-	NA	NA	NA	1
PA4277.1	#N/A	NA	tRNA-Thr	Tradis	NA	-	-	NA	NA	NA	1
PA4276.1	#N/A	NA	tRNA-Trp	Tradis	NA	-	-	NA	NA	NA	1
PA4277.3	#N/A	NA	tRNA-Tyr	Tradis	NA	-	-	NA	NA	NA	1
PA2775.1	#N/A	NA	tRNA-Val	Tradis	NA	-	-	NA	NA	NA	1
PA4020	PA14_11845	mpl	UDP-N-acetylmuramate:L-alanyl-gamma-D-glutamyl-meso-diaminopimelate ligase	Transit	-	-	-	-	-	-	1
PA2566.1	#N/A	NA	Uncharacterized protein	Tradis	NA	-	-	NA	NA	NA	1
PA1867	PA14_40330	xphA	XphA	Tradis	-	-	-	-	-	-	1
													carbon metabolism

## Sheet: GeneOverlap
DataSet 1-B. T0 essential genes of PAO1 in MHB compared to essential genes in rich media in previous studies. Overlap analysis was performed using the GeneOverlap Package in R.
A GeneOverlapMatrix
###### Intersection ######
	Liberati et al. 2006	Poulsen et al. 2019	Skurnik et al. 2013	T0 this study	Turner et al. 2015	Turner et al. 2015 PA14
Lee et al. 2015	312	387	262	380	326	344
Liberati et al. 2006	0	348	343	429	244	306
Poulsen et al. 2019	0	0	294	393	307	361
Skurnik et al. 2013	0	0	0	320	200	250
T0 this study	0	0	0	0	294	338
Turner et al. 2015	0	0	0	0	0	277
###### P-value ######
	Liberati et al. 2006	Poulsen et al. 2019	Skurnik et al. 2013	T0 this study	Turner et al. 2015	Turner et al. 2015 PA14
Lee et al. 2015	5.77351e-122	0	3.12624e-172	0	0	0
Liberati et al. 2006	1	3.30066e-131	1.07322e-119	6.00994e-155	1.47875e-101	1.86775e-133
Poulsen et al. 2019	1	1	1.05068e-193	1.28631e-301	0	0
Skurnik et al. 2013	1	1	1	5.97948e-184	1.92364e-129	1.55487e-169
T0 this study	1	1	1	1	7.65193e-251	7.07501e-273
Turner et al. 2015	1	1	1	1	1	1.11706e-301
###### Odds Ratio ######
	Liberati et al. 2006	Poulsen et al. 2019	Skurnik et al. 2013	T0 this study	Turner et al. 2015	Turner et al. 2015 PA14
Lee et al. 2015	11.3697	222.469	24.6923	87.8454	1310.42	232.81
Liberati et al. 2006	0	10.7116	9.26317	10.2199	12.7676	14.5685
Poulsen et al. 2019	0	0	26.1788	53.6757	254.132	217.055
Skurnik et al. 2013	0	0	0	19.9903	21.842	26.4366
T0 this study	0	0	0	0	92.0093	65.6189
Turner et al. 2015	0	0	0	0	0	178.141
###### Jaccard Index #####
	Liberati et al. 2006	Poulsen et al. 2019	Skurnik et al. 2013	T0 this study	Turner et al. 2015	Turner et al. 2015 PA14
Lee et al. 2015	0.238532	0.659285	0.359396	0.509383	0.704104	0.657744
Liberati et al. 2006	0	0.259701	0.251835	0.30404	0.193805	0.24
Poulsen et al. 2019	0	0	0.384314	0.490637	0.558182	0.62892
Skurnik et al. 2013	0	0	0	0.359147	0.296736	0.356125
T0 this study	0	0	0	0	0.411189	0.451268
Turner et al. 2015	0	0	0	0	0	0.585624

## Sheet: Genome_coverage
DataSet 1-C. Coverage and insertion sites T0 TnSeq sequencing
	Tradis			Transit
Replicate	Total reads	% reads mapped to genome	Unique insertion sites	Total reads	% reads mapped to genome	TA sites
1	4065546	98	86640	4065546	96	94404
2	5894612	98.2	89456	5894612	94.6	94404
3	3796756	98.3	86640	3796756	93.8	94404

## Sheet: Excluded
Dataset 1-D. Genes excluded from Tn-Seq analysis due to not having any TA insertion sites.
locus Tag	Gene Name	Description	# TA sites
PA0050	0	hypothetical protein	0
PA0213	0	hypothetical protein	0
PA0284	0	hypothetical protein	0
PA0517	nirC	probable c-type cytochrome precursor	0
PA0612	ptrB	repressor, PtrB	0
PA0836.1	P5	P5	0
PA1533	0	conserved hypothetical protein	0
PA1702	pcr4	Pcr4	0
PA2288	0	hypothetical protein	0
PA3334	0	probable acyl carrier protein	0
PA3577	0	hypothetical protein	0
PA3668	0	conserved hypothetical protein	0
PA3752	0	hypothetical protein	0
PA4062	0	hypothetical protein	0
PA4134	0	hypothetical protein	0
PA4451.1	P35	P35	0
PA4802.1	0	tRNA-Sec	0
PA4815	0	hypothetical protein	0
PA5289	0	hypothetical protein	0
