# Supplementary material for: Surviving the host: Microbial metabolic genes required for growth of Pseudomonas aeruginosa in physiologically-relevant conditions
Source: Front Microbiol. 2022 Nov 25;13:1055512. doi: 10.3389/fmicb.2022.1055512 (PMC9732424; doi:10.3389/fmicb.2022.1055512)
Supplement: Supplementary file 2 [file Data_Sheet_2.XLSX]

## Sheet: Essential_media
DataSet 2-A. Genes conditionally required for survival of P. aeruginosa in RPMI and/or RPMI/Serum but not in MHB. Gene essentiality was determined using two analysis tools Tradis and Transit. NE indicates gene was not essential in that condition.
Locus Tag	Gene Name	Functional Class	Essential in
			RPMI/Serum	RPMI	Abscess	Skin
PA0002	dnaN	DNA replication and repair	Both	Tradis	Tradis	Tradis
PA0076	tagF1	protein secretion and export	NE	Tradis	NE	NE
PA0078	tssL1	protein secretion and export	NE	Tradis	NE	NE
PA0135	PA0135	Hypothetical unclassified	NE	Tradis	NE	Tradis
PA0157	triB	antibiotic resistance and susceptibility/ membrane	NE	Tradis	NE	Tradis
PA0187	PA0187	Hypothetical unclassified	Tradis	Tradis	Tradis	Tradis
PA0209	PA0209	putative enzyme	Tradis	NE	Tradis	NE
PA0210	mdcC	carbon compound catabolism	Tradis	Tradis	Tradis	Tradis
PA0212	mdcE	carbon compound catabolism	NE	Tradis	Tradis	Tradis
PA0416	chpD	chemotaxis/ transcriptional regulator	NE	Tradis	NE	NE
PA0467	PA0467	Hypothetical unclassified	NE	Tradis	NE	Tradis
PA0489	PA0489	putative enzyme	Tradis	NE	Tradis	Tradis
PA0580	gcp	translation and post translational modification	Both	Tradis	Tradis	Tradis
PA0583	PA0583	biosynthesis cofactors prosthetic groups and carriers	NE	Tradis	Tradis	Tradis
PA0677	hxcW	protein secretion and export	NE	Tradis	NE	NE
PA0700	PA0700	Hypothetical unclassified	NE	Tradis	NE	Tradis
PA0768	lepB	protein secretion and export/ translation and post translational modification	Both	Tradis	Tradis	Tradis
PA0802	PA0802	membrane	Tradis	Tradis	Tradis	Tradis
PA0814	PA0814	Hypothetical unclassified	NE	Tradis	Tradis	Tradis
PA0819	PA0819	Hypothetical unclassified	NE	Tradis	Tradis	NE
PA0850	PA0850	Hypothetical unclassified	Tradis	Tradis	Tradis	NE
PA0878	PA0878	Hypothetical unclassified	NE	Tradis	NE	NE
PA0905.3	PA0905.3	noncoding	NE	Tradis	Tradis	Tradis
PA0966	ruvA	DNA replication and repair	NE	Tradis	Tradis	Tradis
PA1010	dapA	amino acid metabolism and biosynthesis	Tradis	Tradis	Tradis	Tradis
PA1042	PA1042	membrane	Tradis	Tradis	Tradis	Tradis
PA1052	NA	Hypothetical unclassified	NE	Tradis	Tradis	NE
PA1054	shaA	membrane/ transport small molecules	Transit	Transit	NE	NE
PA1057	shaD	membrane/ transport small molecules	NE	Tradis	Tradis	Tradis
PA1059	shaF	membrane/ transport small molecules	Tradis	Tradis	Tradis	Tradis
PA1105	fliJ	cell wall LPS capsule/ motility	NE	Tradis	Tradis	NE
PA1133	PA1133	Hypothetical unclassified	Tradis	Tradis	Tradis	Tradis
PA1159	PA1159	adaptation and protection/ transcriptional regulator	NE	Tradis	NE	Tradis
PA1160	PA1160	Hypothetical unclassified	NE	Tradis	Tradis	Tradis
PA1170	PA1170	membrane	NE	Tradis	NE	NE
PA1172	napC	energy metabolism	NE	Tradis	NE	NE
PA1175	napD	energy metabolism	NE	Tradis	NE	NE
PA1176	napF	energy metabolism	Tradis	Tradis	Tradis	Tradis
PA1177	napE	energy metabolism	NE	Tradis	Tradis	Tradis
PA1235	PA1235	transcriptional regulator	NE	Tradis	NE	NE
PA1255	lhpK	amino acid metabolism and biosynthesis	Tradis	Tradis	NE	NE
PA1261	lhpR	amino acid metabolism and biosynthesis/ transcriptional regulator	NE	Tradis	NE	NE
PA1262	PA1262	membrane/ transport small molecules	NE	Tradis	Tradis	NE
PA1264	PA1264	transcriptional regulator	Tradis	Tradis	Tradis	Tradis
PA1267	lhpB	amino acid metabolism and biosynthesis	NE	Tradis	NE	Tradis
PA1269	PA1269	transcriptional regulator	NE	Tradis	NE	NE
PA1270	PA1270	Hypothetical unclassified	NE	Transit	NE	NE
PA1272	cobO	biosynthesis cofactors prosthetic groups and carriers	NE	Tradis	Tradis	NE
PA1275	cobD	biosynthesis cofactors prosthetic groups and carriers	Transit	Tradis	Tradis	Tradis
PA1276	cobC	biosynthesis cofactors prosthetic groups and carriers	NE	Tradis	NE	Tradis
PA1277	cobQ	biosynthesis cofactors prosthetic groups and carriers	NE	Tradis	Tradis	Tradis
PA1278	cobP	biosynthesis cofactors prosthetic groups and carriers	NE	Tradis	NE	NE
PA1314	PA1314	Hypothetical unclassified	Tradis	Tradis	NE	Tradis
PA1350	PA1350	Hypothetical unclassified	NE	Tradis	NE	NE
PA1352	PA1352	membrane	NE	Tradis	NE	NE
PA1397	PA1397	transcriptional regulator/ two component regulator	NE	Tradis	NE	NE
PA1416	PA1416	Hypothetical unclassified	NE	Both	NE	NE
PA1417	PA1417	putative enzyme	Transit	NE	NE	NE
PA1465	PA1465	Hypothetical unclassified	NE	Tradis	NE	NE
PA1503	PA1503	Hypothetical unclassified	NE	Tradis	Tradis	Tradis
PA1549	PA1549	membrane/ transport small molecules	Transit	Transit	Both	Both
PA1578	PA1578	Hypothetical unclassified	NE	Tradis	NE	NE
PA1618	PA1618	Hypothetical unclassified	NE	Tradis	NE	NE
PA1641	PA1641	Hypothetical unclassified	NE	Tradis	Tradis	Tradis
PA1653	PA1653	transcriptional regulator	NE	Tradis	Tradis	NE
PA1685	masA	amino acid metabolism and biosynthesis	Tradis	Tradis	Tradis	Tradis
PA1694	pscQ	protein secretion and export	NE	Tradis	Tradis	NE
PA1696	pscO	protein secretion and export	NE	Tradis	Tradis	Tradis
PA1704	pcrR	transcriptional regulator	Tradis	Tradis	Tradis	Tradis
PA1707	pcrH	protein secretion and export/ secreted factors	NE	Tradis	Tradis	NE
PA1715	pscB	protein secretion and export	Tradis	Tradis	Tradis	Tradis
PA1721	pscH	protein secretion and export	NE	Tradis	NE	NE
PA1816	dnaQ	nucleotide biosynthesis and metabolism	NE	Tradis	Tradis	Tradis
PA1827	PA1827	putative enzyme	Tradis	NE	Tradis	Tradis
PA1869	PA1869	FA and phospholipid metabolism	NE	Tradis	NE	NE
PA1870	PA1870	Hypothetical unclassified	NE	Tradis	NE	NE
PA1874	PA1874	antibiotic resistance and susceptibility	Transit	Transit	NE	NE
PA1885	PA1885	putative enzyme	NE	Tradis	Tradis	Tradis
PA1891	PA1891	membrane	NE	Tradis	NE	NE
PA1908	PA1908	membrane/ transport small molecules	Tradis	Tradis	Tradis	Tradis
PA1917	PA1917	Hypothetical unclassified	NE	Tradis	Tradis	NE
PA1924	PA1924	Hypothetical unclassified	Tradis	Tradis	Tradis	Tradis
PA1960	PA1960	membrane	NE	Tradis	NE	NE
PA1972	PA1972	membrane	Transit	NE	NE	NE
PA1973	pqqF	biosynthesis cofactors prosthetic groups and carriers	NE	Tradis	Tradis	NE
PA1976	ercS'	two component regulator	Transit	Transit	Transit	NE
PA1979	eraS	two component regulator	NE	Tradis	NE	NE
PA1988	pqqD	biosynthesis cofactors prosthetic groups and carriers	Tradis	Tradis	Tradis	Tradis
PA1990	pqqH	putative enzyme	NE	Transit	Both	NE
PA1995	PA1995	Hypothetical unclassified	NE	Tradis	Tradis	NE
PA2000	dchB	amino acid metabolism and biosynthesis/ carbon compound catabolism	NE	Tradis	Tradis	Tradis
PA2008	fahA	carbon compound catabolism	NE	Tradis	NE	Tradis
PA2023	galU	central intermediary metabolism	Transit	NE	NE	NE
PA2027	PA2027	Hypothetical unclassified	NE	Tradis	Tradis	Tradis
PA2034	PA2034	Hypothetical unclassified	Tradis	Tradis	NE	NE
PA2038	PA2038	Hypothetical unclassified	NE	Tradis	NE	NE
PA2052	cynS	central intermediary metabolism	NE	Tradis	NE	NE
PA2076	PA2076	transcriptional regulator	NE	Tradis	Tradis	NE
PA2087	PA2087	Hypothetical unclassified	NE	Tradis	Tradis	Tradis
PA2091	PA2091	membrane	NE	Both	Tradis	NE
PA2092	PA2092	membrane/ transport small molecules	NE	Tradis	Tradis	Tradis
PA2094	PA2094	membrane/ transcriptional regulator	Tradis	Tradis	NE	NE
PA2112	PA2112	Hypothetical unclassified	Tradis	Tradis	Tradis	NE
PA2115	PA2115	transcriptional regulator	NE	Tradis	NE	NE
PA2120	PA2120	Hypothetical unclassified	NE	Tradis	NE	NE
PA2143	PA2143	Hypothetical unclassified	NE	Tradis	NE	NE
PA2152	PA2152	putative enzyme	NE	Transit	Transit	NE
PA2156	PA2156	Hypothetical unclassified	NE	Tradis	Tradis	Tradis
PA2170	PA2170	Hypothetical unclassified	NE	Tradis	Tradis	NE
PA2171	PA2171	Hypothetical unclassified	NE	Tradis	Tradis	NE
PA2175	PA2175	Hypothetical unclassified	Tradis	Tradis	NE	Tradis
PA2176	PA2176	Hypothetical unclassified	NE	Tradis	Tradis	Tradis
PA2186	PA2186	Hypothetical unclassified	NE	Tradis	Tradis	Tradis
PA2190	PA2190	Hypothetical unclassified	NE	Tradis	NE	NE
PA2206	PA2206	transcriptional regulator	NE	Tradis	Tradis	Tradis
PA2249	bkdB	amino acid metabolism and biosynthesis	NE	Tradis	NE	NE
PA2256	pvcC	amino acid metabolism and biosynthesis/ secreted factors	NE	Transit	NE	NE
PA2259	ptxS	transcriptional regulator	NE	Tradis	Tradis	Tradis
PA2261	PA2261	carbon compound catabolism	Tradis	Tradis	Tradis	Tradis
PA2267	PA2267	transcriptional regulator	NE	Tradis	NE	NE
PA2274	PA2274	Hypothetical unclassified	NE	Tradis	NE	NE
PA2277	arsR	transcriptional regulator	NE	Tradis	Tradis	NE
PA2284	PA2284	Hypothetical unclassified	NE	Tradis	NE	NE
PA2286	PA2286	membrane	NE	Tradis	Tradis	NE
PA2287	PA2287	Hypothetical unclassified	Tradis	NE	Tradis	NE
PA2292	PA2292	Hypothetical unclassified	NE	Tradis	NE	NE
PA2297	PA2297	energy metabolism	NE	Tradis	Tradis	Tradis
PA2299	PA2299	transcriptional regulator	Tradis	Tradis	Tradis	Tradis
PA2301	PA2301	Hypothetical unclassified	NE	Tradis	NE	NE
PA2305	ambB	secreted factors	NE	Transit	NE	Transit
PA2308	PA2308	transport small molecules	NE	Tradis	NE	NE
PA2314	PA2314	membrane/ transport small molecules	Tradis	NE	Tradis	NE
PA2316	PA2316	transcriptional regulator	NE	Tradis	Tradis	NE
PA2330	PA2330	Hypothetical unclassified	Tradis	Tradis	Tradis	Tradis
PA2331	PA2331	membrane	Tradis	Tradis	Tradis	Tradis
PA2342	mtlD	carbon compound catabolism	Transit	NE	Tradis	NE
PA2346	PA2346	putative enzyme	Transit	Tradis	NE	Tradis
PA2351	PA2351	membrane/ transport small molecules	NE	Tradis	NE	NE
PA2352	PA2352	putative enzyme	NE	Tradis	Tradis	NE
PA2355	PA2355	putative enzyme	NE	Tradis	Tradis	Tradis
PA2362	dotU3	Hypothetical unclassified	NE	Tradis	Tradis	Tradis
PA2368	hsiF3	Hypothetical unclassified	Tradis	Tradis	Tradis	Tradis
PA2375	PA2375	membrane	Tradis	Tradis	Tradis	Tradis
PA2381	PA2381	Hypothetical unclassified	NE	Tradis	NE	Tradis
PA2383	PA2383	transcriptional regulator	NE	Tradis	Tradis	Tradis
PA2404	fpvH	membrane	Tradis	Tradis	NE	NE
PA2405	fpvJ	Hypothetical unclassified	Tradis	Tradis	Tradis	NE
PA2410	fpvF	transport small molecules	NE	Tradis	Tradis	Tradis
PA2433	PA2433	Hypothetical unclassified	Tradis	Tradis	NE	NE
PA2434	PA2434	Hypothetical unclassified	NE	Tradis	Tradis	Tradis
PA2436	PA2436	Hypothetical unclassified	Tradis	Tradis	Tradis	Tradis
PA2445	gcvP2	amino acid metabolism and biosynthesis/ central intermediary metabolism	NE	Transit	Transit	NE
PA2451	PA2451	Hypothetical unclassified	NE	Tradis	Tradis	NE
PA2496	PA2496	Hypothetical unclassified	NE	Tradis	Tradis	NE
PA2499	PA2499	putative enzyme	NE	Tradis	Tradis	NE
PA2506	PA2506	Hypothetical unclassified	NE	Tradis	Tradis	Tradis
PA2509	catB	carbon compound catabolism	NE	Tradis	Tradis	NE
PA2516	xylZ	carbon compound catabolism/ energy metabolism	Transit	NE	Tradis	Tradis
PA2542	PA2542	Hypothetical unclassified	Transit	Transit	NE	Transit
PA2560	PA2560	Hypothetical unclassified	NE	Tradis	Tradis	Tradis
PA2738	himA	transcription RNA processing and degredation/ DNA replication and repair/ translation and post-translational modification	NE	Tradis	Tradis	Tradis
PA2805	PA2805	Hypothetical unclassified	Tradis	Tradis	Tradis	NE
PA2819.1	PA2819.1	noncoding	NE	Tradis	NE	Tradis
PA2851	efp	translation and post translational modification	Tradis	Tradis	Tradis	Tradis
PA2876	pyrF	nucleotide biosynthesis and metabolism	Tradis	Tradis	Tradis	Tradis
PA2890	atuE	putative enzyme	NE	Tradis	NE	Tradis
PA2895	sbrR	transcriptional regulator	Tradis	NE	Tradis	NE
PA2905	cobH	biosynthesis cofactors prosthetic groups and carriers	Tradis	NE	NE	NE
PA2910	PA2910	membrane	Tradis	Tradis	Tradis	Tradis
PA2916	PA2916	membrane	Tradis	Tradis	Tradis	Tradis
PA2970	rpmF	translation and post translational modification	NE	Tradis	Tradis	Tradis
PA2978	ptpA	adaptation and protection/ cell wall LPS and capsule/ translation and post-translational modification	NE	Tradis	NE	NE
PA2983	PA2983	transport small molecules	NE	Tradis	Tradis	Tradis
PA2991	sth	nucleotide biosynthesis and metabolism	NE	Both	Tradis	Tradis
PA3005	nagZ	amino acid metabolism and biosynthesis/ antibiotic resistance and susceptibility	Tradis	Tradis	Tradis	Tradis
PA3050	pyrD	nucleotide biosynthesis and metabolism	Tradis	NE	Tradis	Tradis
PA3071	PA3071	Hypothetical unclassified	NE	Tradis	NE	Tradis
PA3073	PA3073	Hypothetical unclassified	NE	Tradis	NE	NE
PA3074	PA3074	Hypothetical unclassified	NE	Tradis	Both	NE
PA3090	PA3090	Hypothetical unclassified	NE	Tradis	NE	NE
PA3108	purF	amino acid metabolism and biosynthesis/ nucleotide biosynthesis and metabolism	NE	Both	Both	NE
PA3133.3	PA3133.3	noncoding	Tradis	Tradis	Tradis	Tradis
PA3151	hisF2	amino acid metabolism and biosynthesis	NE	Tradis	Tradis	Tradis
PA3166	pheA	amino acid metabolism and biosynthesis	NE	Tradis	Tradis	Tradis
PA3178	PA3178	Hypothetical unclassified	NE	Tradis	NE	NE
PA3201	PA3201	membrane	Tradis	NE	Tradis	NE
PA3209	PA3209	Hypothetical unclassified	NE	Tradis	NE	NE
PA3214	PA3214	Hypothetical unclassified	NE	Tradis	NE	NE
PA3263	PA3263	Hypothetical unclassified	NE	Tradis	Tradis	Tradis
PA3288	PA3288	Hypothetical unclassified	NE	Tradis	Tradis	Tradis
PA3304.1	P18	noncoding	NE	Tradis	NE	Tradis
PA3314	PA3314	transport small molecules	NE	Tradis	Tradis	NE
PA3352	PA3352	Hypothetical unclassified	Tradis	NE	Tradis	Tradis
PA3354	PA3354	Hypothetical unclassified	NE	Tradis	NE	Tradis
PA3395	nosY	energy metabolism/ membrane	Tradis	NE	Tradis	NE
PA3406	hasD	protein secretion and export/ transport small molecules	NE	Transit	NE	NE
PA3411	PA3411	Hypothetical unclassified	NE	Tradis	NE	NE
PA3413	PA3413	Hypothetical unclassified	NE	Tradis	NE	NE
PA3415	PA3415	energy metabolism	NE	Tradis	NE	NE
PA3417	PA3417	energy metabolism	Transit	Tradis	NE	NE
PA3420	PA3420	transcriptional regulator	Transit	NE	Both	NE
PA3442	PA3442	transport small molecules	NE	Tradis	Tradis	Tradis
PA3448	PA3448	membrane/ transport small molecules	NE	Tradis	NE	Tradis
PA3458	PA3458	transcriptional regulator	NE	Tradis	NE	NE
PA3466	PA3466	transcription RNA processing and degredation	NE	Tradis	Tradis	NE
PA3505	PA3505	Hypothetical unclassified	Tradis	Tradis	NE	Tradis
PA3507	PA3507	putative enzyme	NE	Tradis	Tradis	Tradis
PA3527	pyrC	nucleotide biosynthesis and metabolism	Both	Tradis	Tradis	NE
PA3569	mmsB	carbon compound catabolism	NE	Tradis	Tradis	NE
PA3638	PA3638	Hypothetical unclassified	NE	Tradis	Tradis	NE
PA3642	rnhB	DNA replication and repair	NE	Tradis	Tradis	Tradis
PA3719	armR	antibiotic resistance and susceptibility	NE	Tradis	NE	Tradis
PA3727	PA3727	Hypothetical unclassified	NE	Tradis	NE	NE
PA3763	purL	nucleotide biosynthesis and metabolism	Transit	NE	NE	NE
PA3777	xseA	DNA replication and repair	NE	Tradis	Tradis	NE
PA3881	PA3881	Hypothetical unclassified	NE	Tradis	Tradis	NE
PA3939	PA3939	Hypothetical unclassified	NE	Tradis	Tradis	Tradis
PA3941	PA3941	Hypothetical unclassified	NE	Tradis	Tradis	Tradis
PA3952	PA3952	Hypothetical unclassified	Tradis	Tradis	Tradis	Tradis
PA4018	PA4018	Hypothetical unclassified	NE	Tradis	Tradis	Tradis
PA4020	mpl	antibiotic resistance and susceptibility/ cell wall LPS and capsule	Transit	NE	NE	NE
PA4021	PA4021	transcriptional regulator	NE	Transit	NE	NE
PA4111	PA4111	Hypothetical unclassified	NE	Tradis	NE	NE
PA4139	PA4139	Hypothetical unclassified	NE	Tradis	Tradis	Tradis
PA4158	fepC	transport small molecules	Tradis	NE	Tradis	NE
PA4161	fepG	membrane/ transport small molecules	NE	Tradis	NE	NE
PA4165	PA4165	transcriptional regulator	Transit	NE	Tradis	NE
PA4216	phzG1	secreted factors	NE	Tradis	NE	NE
PA4219	ampO	antibiotic resistance and susceptibility/ membrane	NE	Tradis	Tradis	Tradis
PA4220	PA4220	Hypothetical unclassified	NE	Tradis	Tradis	NE
PA4224	pchG	membrane/ transport small molecules	NE	Tradis	Tradis	Tradis
PA4225	pchF	secreted factors/ transport small molecules	Transit	Transit	Transit	Transit
PA4280	birA	biosynthesis cofactors prosthetic groups and carriers	Transit	NE	NE	NE
PA4299	tadD	motility	NE	Tradis	NE	Tradis
PA4300	tadC	membrane/ motility	NE	Tradis	NE	NE
PA4368	PA4368	Hypothetical unclassified	NE	Tradis	Tradis	Tradis
PA4377	PA4377	Hypothetical unclassified	NE	Tradis	NE	NE
PA4395	PA4395	Hypothetical unclassified	Tradis	Tradis	Tradis	NE
PA4422	PA4422	Hypothetical unclassified	NE	Tradis	Tradis	Tradis
PA4457	PA4457	secreted factors	Tradis	Tradis	Tradis	Tradis
PA4464	ptsN	transport small molecules	NE	Tradis	NE	Tradis
PA4531	PA4531	Hypothetical unclassified	Tradis	Tradis	Tradis	Tradis
PA4541.3	PA4541.3	noncoding	NE	Tradis	Tradis	Tradis
PA4545	comL	cell wall LPS capsule	Transit	NE	NE	NE
PA4558	PA4558	chaperones and heatshock/ translation and post tranlational modification	NE	Tradis	Tradis	Tradis
PA4672	PA4672	translation and post translational modification	NE	Tradis	NE	Tradis
PA4673.1	PA4673.1	noncoding	Tradis	Tradis	Tradis	Tradis
PA4729	panB	biosynthesis cofactors prosthetic groups and carriers	NE	Tradis	Tradis	NE
PA4758	carA	amino acid metabolism and biosynthesis/ nucleotide biosynthesis and metabolism	Transit	Transit	Tradis	Tradis
PA4760	dnaJ	adaptation and protection/ DNA replication and repair/ chaperones and heatshock	Transit	Tradis	Tradis	Tradis
PA4789	PA4789	Hypothetical unclassified	NE	Tradis	Tradis	NE
PA4822	PA4822	membrane	NE	Tradis	NE	Tradis
PA4824	PA4824	Hypothetical unclassified	NE	Tradis	Tradis	Tradis
PA4841	PA4841	Hypothetical unclassified	NE	Tradis	NE	Tradis
PA4853	fis	DNA replication and repair/ transcription RNA processing and degredation/ transcriptional regulator	NE	Tradis	NE	Tradis
PA4854	purH	nucleotide biosynthesis and metabolism	Both	Both	Both	NE
PA4855	purD	nucleotide biosynthesis and metabolism	Transit	Both	Tradis	NE
PA4884	PA4884	Hypothetical unclassified	NE	Tradis	Tradis	NE
PA4895	PA4895	membrane/ transcriptional regulator	NE	Tradis	NE	Tradis
PA4907	PA4907	putative enzyme	NE	Tradis	NE	NE
PA4998	PA4998	Hypothetical unclassified	NE	Tradis	Tradis	Tradis
PA4999	waaL	membrane	NE	Tradis	NE	Tradis
PA5000	wapR	cell wall LPS capsule	Transit	NE	NE	NE
PA5001	ssg	Hypothetical unclassified	Transit	NE	Tradis	NE
PA5004	wapH	putative enzyme	Transit	Tradis	Tradis	Tradis
PA5005	PA5005	putative enzyme	Transit	NE	NE	NE
PA5015	aceE	amino acid metabolism and biosynthesis/ energy metabolism	Transit	Both	Transit	Both
PA5062	PA5062	Hypothetical unclassified	Tradis	NE	Tradis	Tradis
PA5068	tatA	protein secretion and export	NE	Tradis	Tradis	Tradis
PA5069	tatB	protein secretion and export	NE	Tradis	Tradis	Tradis
PA5160.1	PA5160.1	noncoding	Tradis	Tradis	Tradis	Tradis
PA5221	PA5221	putative enzyme	NE	Tradis	NE	NE
PA5320	coaC	biosynthesis cofactors prosthetic groups and carriers/ DNA replication and repair	Tradis	Tradis	Tradis	NE
PA5350	rubA2	carbon compound catabolism	NE	Tradis	NE	Tradis
PA5366	pstB	membrane/ transport small molecules	Transit	Tradis	Tradis	Tradis
PA5384	hocS	carbon compound catabolism/ central intermediary metabolism	NE	Tradis	NE	NE
PA5406	PA5406	Hypothetical unclassified	Tradis	Tradis	Tradis	Tradis
PA5426	purE	nucleotide biosynthesis and metabolism	Tradis	Tradis	Tradis	Tradis
PA5565	gidA	cell division	Transit	Transit	Tradis	Tradis
PA5567	PA5567	putative enzyme	NE	Tradis	Tradis	Tradis

## Sheet: Essential_Abscess
Dataset 2-B: Genes determined to be conditionally required for survival in P. aeruginosa grown in a murine abscess model that were not important for growth in MHB. Gene essentiality was determined using two analysis tools Tradis and Transit and compared to genes determined to be conditionally important for survival in RPMI/Serum, RPMI, and a human skin organoid model. NE indicates gene was not es…
Locus Tag	Gene Name	Functional class	Essential in
			Abscess	Skin	RPMI/ Serum	RPMI
PA0139	ahpC	adaptation and protection	Tradis	NE	NE	NE
PA0211	mdcD	carbon compound catabolism	Tradis	NE	NE	NE
PA0339	PA0339	Hypothetical unclassified	Tradis	NE	NE	NE
PA0396	pilU	motility	Tradis	NE	NE	NE
PA0501	bioF	biosynthesis cofactors prosthetic groups and carriers	Tradis	NE	NE	NE
PA0512	nirH	biosynthesis cofactors prosthetic groups and carriers/ energy metabolism	Tradis	NE	NE	NE
PA0666	PA0666	Hypothetical unclassified	Tradis	NE	NE	NE
PA0695	PA0695	Hypothetical unclassified	Tradis	NE	NE	NE
PA0721	PA0721	related to phage	Tradis	NE	NE	NE
PA0863	PA0863	putative enzyme	Tradis	NE	NE	NE
PA0905	rsmA	adaptation and protection/ translation and post-translational modification	Tradis	NE	NE	NE
PA0914	PA0914	Hypothetical unclassified	Tradis	NE	NE	NE
PA0984	PA0984	membrane/ secreted factors	Tradis	NE	NE	NE
PA1050	PA1050	Hypothetical unclassified	Tradis	NE	NE	NE
PA1101	fliF	cell wall LPS capsule/ motility	Both	NE	NE	NE
PA1102	fliG	cell wall LPS capsule/ motility	Tradis	NE	NE	NE
PA1103	PA1103	cell wall LPS capsule/ motility	Tradis	NE	NE	NE
PA1104	fliI	energy metabolism/ motility	Tradis	NE	NE	NE
PA1114	PA1114	Hypothetical unclassified	Tradis	NE	NE	NE
PA1121	yfiR	cell wall LPS capsule	Tradis	NE	NE	NE
PA1125	PA1125	biosynthesis cofactors prosthetic groups and carriers	Tradis	NE	NE	NE
PA1146	PA1146	carbon compound catabolism	Tradis	NE	NE	NE
PA1184	PA1184	transcriptional regulator	Tradis	NE	NE	NE
PA1232	PA1232	membrane	Transit	NE	NE	NE
PA1237	PA1237	antibiotic resistance/susceptibility; transport small molecules	Tradis	NE	NE	NE
PA1301	PA1301	membrane/ transcriptional regulator	Tradis	NE	NE	NE
PA1362	PA1362	Hypothetical unclassified	Tradis	NE	NE	NE
PA1363	PA1363	transcriptional regulator	Tradis	NE	NE	NE
PA1445	fliO	adaptation and protection/ chemotaxis/ motility	Tradis	NE	NE	NE
PA1446	fliP	adaptation and protection/ chemotaxis/ motility	Tradis	NE	NE	NE
PA1447	fliQ	adaptation and protection/ chemotaxis/ motility	Tradis	NE	NE	NE
PA1448	fliR	adaptation and protection/ chemotaxis/ motility	Tradis	NE	NE	NE
PA1453	flhF	adaptation and protection/ chemotaxis/ motility	Tradis	NE	NE	NE
PA1458	PA1458	chemotaxis/ two component regulator	Transit	NE	NE	NE
PA1464	PA1464	adaptation and protection/ chemotaxis	Tradis	NE	NE	NE
PA1483	cycH	energy metabolism	Tradis	NE	NE	NE
PA1526	PA1526	transcriptional regulator	Tradis	NE	NE	NE
PA1629	PA1629	carbon compound catabolism	Tradis	NE	NE	NE
PA1645	PA1645	Hypothetical unclassified	Tradis	NE	NE	NE
PA1676	PA1676	membrane	Tradis	NE	NE	NE
PA1697	PA1697	protein secretion and export	Tradis	NE	NE	NE
PA1698	popN	membrane/ protein secretion and export	Tradis	NE	NE	NE
PA1728	PA1728	Hypothetical unclassified	Tradis	NE	NE	NE
PA1729	PA1729	Hypothetical unclassified	Tradis	NE	NE	NE
PA1743	PA1743	Hypothetical unclassified	Tradis	NE	NE	NE
PA1882	PA1882	membrane/ transport small molecules	Tradis	NE	NE	NE
PA1912	femI	transcriptional regulator	Tradis	NE	NE	NE
PA1956	fapA	motility	Tradis	NE	NE	NE
PA1963	PA1963	Hypothetical unclassified	Tradis	NE	NE	NE
PA1986	pqqB	biosynthesis cofactors prosthetic groups and carriers	Tradis	NE	NE	NE
PA1989	pqqE	biosynthesis cofactors prosthetic groups and carriers	Tradis	NE	NE	NE
PA2003	bdhA	carbon compound catabolism	Tradis	NE	NE	NE
PA2064	pcoB	adaptation and protection	Tradis	NE	NE	NE
PA2066	PA2066	Hypothetical unclassified	Tradis	NE	NE	NE
PA2074	PA2074	Hypothetical unclassified	Tradis	NE	NE	NE
PA2097	PA2097	carbon compound catabolism	Tradis	NE	NE	NE
PA2135	PA2135	membrane/ transport small molecules	Tradis	NE	NE	NE
PA2179	PA2179	Hypothetical unclassified	Tradis	NE	NE	NE
PA2201	PA2201	Hypothetical unclassified	Tradis	NE	NE	NE
PA2226	qsrO	Hypothetical unclassified	Tradis	NE	NE	NE
PA2236	pslF	cell wall LPS capsule	Tradis	NE	NE	NE
PA2253	ansA	amino acid metabolism and biosynthesis	Tradis	NE	NE	NE
PA2327	PA2327	membrane/ transport small molecules	Tradis	NE	NE	NE
PA2357	msuE	carbon compound catabolism/ central intermediary metabolism	Tradis	NE	NE	NE
PA2415	PA2415	membrane	Tradis	NE	NE	NE
PA2427	PA2427	Hypothetical unclassified	Tradis	NE	NE	NE
PA2483	PA2483	putative enzyme	Tradis	NE	NE	NE
PA2490	PA2490	Hypothetical unclassified	Tradis	NE	NE	NE
PA2532	tpx	adaptation and protection	Tradis	NE	NE	NE
PA2737	PA2737	Hypothetical unclassified	Tradis	NE	NE	NE
PA2780	bswR	transcriptional regulator	Tradis	NE	NE	NE
PA2808	ptrA	adaptation and protection/ transcriptional regulator	Tradis	NE	NE	NE
PA2857	PA2857	transport small molecules	Tradis	NE	NE	NE
PA2883	PA2883	Hypothetical unclassified	Tradis	NE	NE	NE
PA2906	PA2906	putative enzyme	Tradis	NE	NE	NE
PA2921	PA2921	transcriptional regulator	Tradis	NE	NE	NE
PA2937	PA2937	Hypothetical unclassified	Tradis	NE	NE	NE
PA2971	PA2971	Hypothetical unclassified	Tradis	NE	NE	NE
PA2976	rne	transcription RNA processing and degredation	Tradis	NE	NE	NE
PA3040	PA3040	Hypothetical unclassified	Tradis	NE	NE	NE
PA3062	pelC	cell wall LPS capsule	Tradis	NE	NE	NE
PA3063	pelB	cell wall LPS capsule	Transit	NE	NE	NE
PA3152	hisH2	amino acid metabolism and biosynthesis	Tradis	NE	NE	NE
PA3165	hisC2	amino acid metabolism and biosynthesis	Tradis	NE	NE	NE
PA3221	csaA	chaperones and heatshock/ protein secretion and export	Tradis	NE	NE	NE
PA3315	PA3315	membrane/ transport small molecules	Tradis	NE	NE	NE
PA3320	PA3320	membrane	Tradis	NE	NE	NE
PA3358	PA3358	membrane	Tradis	NE	NE	NE
PA3376	PA3376	transport small molecules	Tradis	NE	NE	NE
PA3380	PA3380	transport small molecules	Tradis	NE	NE	NE
PA3388	PA3388	Hypothetical unclassified	Tradis	NE	NE	NE
PA3591	PA3591	carbon compound catabolism	Tradis	NE	NE	NE
PA3788	PA3788	membrane	Tradis	NE	NE	NE
PA3816	cysE	amino acid metabolism and biosynthesis/ biosynthesis of cofactors prosthetic groups and carriers	Tradis	NE	NE	NE
PA3818	PA3818	adaptation and protection/ translation and post-translational modification	Tradis	NE	NE	NE
PA3851	PA3851	Hypothetical unclassified	Tradis	NE	NE	NE
PA3905	PA3905	Hypothetical unclassified	Tradis	NE	NE	NE
PA4012	PA4012	Hypothetical unclassified	Tradis	NE	NE	NE
PA4064	PA4064	transport small molecules	Tradis	NE	NE	NE
PA4201	ddlA	cell wall LPS capsule	Tradis	NE	NE	NE
PA4289	PA4289	membrane/ transport small molecules	Tradis	NE	NE	NE
PA4367	bifA	cell wall LPS capsule/ motility	Both	NE	NE	NE
PA4466	PA4466	transport small molecules	Tradis	NE	NE	NE
PA4486	PA4486	putative enzyme	Tradis	NE	NE	NE
PA4508	PA4508	transcriptional regulator	Tradis	NE	NE	NE
PA4726.1	P36	noncoding	Tradis	NE	NE	NE
PA4770	lldP	transport small molecules	Both	NE	NE	NE
PA4802	PA4802	Hypothetical unclassified	Tradis	NE	NE	NE
PA4856	retS	two component regulator	Transit	NE	NE	NE
PA4864	ureD	central intermediary metabolism	Tradis	NE	NE	NE
PA4867	ureB	central intermediary metabolism	Tradis	NE	NE	NE
PA5007	wapG	putative enzyme	Tradis	NE	NE	NE
PA5017	dipA	Hypothetical unclassified	Transit	NE	NE	NE
PA5115	PA5115	Hypothetical unclassified	Tradis	NE	NE	NE
PA5192	pckA	carbon compound catabolism/ energy metabolism	Both	NE	NE	NE
PA5305	PA5305	Hypothetical unclassified	Tradis	NE	NE	NE
PA5352	PA5352	Hypothetical unclassified	Tradis	NE	NE	NE
PA5443	uvrD	DNA replication and repair	Transit	NE	NE	NE
PA0332	PA0332	Hypothetical unclassified	Tradis	Tradis	NE	NE
PA0424	mexR	transcriptional regulator	Tradis	Tradis	NE	NE
PA0553	PA0553	Hypothetical unclassified	Tradis	Tradis	NE	NE
PA0597	PA0597	putative enzyme	Tradis	Tradis	NE	NE
PA0624	PA0624	related to phage	Tradis	Tradis	NE	NE
PA0678	hxcU	protein secretion and export	Tradis	Tradis	NE	NE
PA0687	hxcS	protein secretion and export	Tradis	Tradis	NE	NE
PA0738	PA0738	membrane	Tradis	Tradis	NE	NE
PA0760	PA0760	Hypothetical unclassified	Tradis	Tradis	NE	NE
PA0853	PA0853	putative enzyme	Tradis	Tradis	NE	NE
PA0906	alpR	transcriptional regulator	Tradis	Tradis	NE	NE
PA0965	ruvC	DNA replication and repair	Tradis	Tradis	NE	NE
PA0967	ruvB	DNA replication and repair	Tradis	Tradis	NE	NE
PA1111	PA1111	Hypothetical unclassified	Tradis	Tradis	NE	NE
PA1263	PA1263	Hypothetical unclassified	Tradis	Tradis	NE	NE
PA1401	PA1401	Hypothetical unclassified	Tradis	Tradis	NE	NE
PA1463	PA1463	Hypothetical unclassified	Tradis	Tradis	NE	NE
PA1486	bapF	amino acid metabolism and biosynthesis	Tradis	Tradis	NE	NE
PA1492	PA1492	Hypothetical unclassified	Tradis	Tradis	NE	NE
PA1547	PA1547	membrane	Tradis	Tradis	NE	NE
PA1548	PA1548	Hypothetical unclassified	Tradis	Tradis	NE	NE
PA1558	PA1558	Hypothetical unclassified	Tradis	Tradis	NE	NE
PA1766	PA1766	Hypothetical unclassified	Tradis	Tradis	NE	NE
PA1793	ppiB	chaperones and heatshock/ translation and post-translational modification	Tradis	Tradis	NE	NE
PA1842	PA1842	Hypothetical unclassified	Tradis	Tradis	NE	NE
PA2031	PA2031	Hypothetical unclassified	Tradis	Tradis	NE	NE
PA2239	pslI	cell wall LPS capsule	Tradis	Tradis	NE	NE
PA2273	soxR	transcriptional regulator	Tradis	Tradis	NE	NE
PA2384	PA2384	Hypothetical unclassified	Tradis	Tradis	NE	NE
PA2406	fpvK	Hypothetical unclassified	Tradis	Tradis	NE	NE
PA2412	PA2412	Hypothetical unclassified	Tradis	Tradis	NE	NE
PA2442	gcvT2	amino acid metabolism and biosynthesis/ central intermediary metabolism	Tradis	Tradis	NE	NE
PA2703	tsi2	adaptation and protection	Tradis	Tradis	NE	NE
PA2724	PA2724	Hypothetical unclassified	Tradis	Tradis	NE	NE
PA2733	PA2733	Hypothetical unclassified	Tradis	Tradis	NE	NE
PA2920	PA2920	adaptation and protection/ chemotaxis	Tradis	Tradis	NE	NE
PA2933	PA2933	membrane/ transport small molecules	Tradis	Tradis	NE	NE
PA2964	pabC	biosynthesis cofactors prosthetic groups and carriers	Tradis	Tradis	NE	NE
PA2965	fabF1	FA and phospholipid metabolism	Tradis	Tradis	NE	NE
PA2972	PA2972	Hypothetical unclassified	Tradis	Tradis	NE	NE
PA3197	PA3197	Hypothetical unclassified	Tradis	Tradis	NE	NE
PA3198	PA3198	Hypothetical unclassified	Tradis	Tradis	NE	NE
PA3259.1	PA3259.1	Hypothetical unclassified	Tradis	Tradis	NE	NE
PA3284	PA3284	Hypothetical unclassified	Tradis	Tradis	NE	NE
PA3330	PA3330	putative enzyme	Tradis	Tradis	NE	NE
PA3480	PA3480	nucleotide biosynthesis and metabolism	Tradis	Tradis	NE	NE
PA3632	PA3632	Hypothetical unclassified	Tradis	Tradis	NE	NE
PA3800	PA3800	Hypothetical unclassified	Tradis	Tradis	NE	NE
PA3865.1	PA3865.1	adaptation and protection	Tradis	Tradis	NE	NE
PA3900	fecR	membrane/ transcriptional regulator	Tradis	Tradis	NE	NE
PA4089	PA4089	putative enzyme	Tradis	Tradis	NE	NE
PA4202	nmoA	putative enzyme	Tradis	Tradis	NE	NE
PA4452	PA4452	Hypothetical unclassified	Tradis	Tradis	NE	NE
PA4534	PA4534	Hypothetical unclassified	Tradis	Tradis	NE	NE
PA4585	rtcA	transcription RNA processing and degredation	Tradis	Tradis	NE	NE
PA4626	hprA	central intermediary metabolism	Tradis	Tradis	NE	NE
PA4816	PA4816	Hypothetical unclassified	Tradis	Tradis	NE	NE
PA4896	PA4896	transcriptional regulator	Tradis	Tradis	NE	NE
PA4951	orn	transcription RNA processing and degredation	Tradis	Tradis	NE	NE
PA4962	PA4962	membrane	Tradis	Tradis	NE	NE
PA4966	PA4966	Hypothetical unclassified	Tradis	Tradis	NE	NE
PA5070	tatC	membrane/ transport small molecules	Tradis	Tradis	NE	NE
PA5198	PA5198	Hypothetical unclassified	Tradis	Tradis	NE	NE
PA5401	PA5401	Hypothetical unclassified	Tradis	Tradis	NE	NE
PA5563	soj	cell division	Tradis	Tradis	NE	NE
PA4844	ctpL	adaptation and protection/ chemotaxis	Transit	Transit	NE	NE
PA5345	recG	DNA replication and repair/ transcriptional regulator	Transit	Transit	NE	NE
PA0819	PA0819	Hypothetical unclassified	Tradis	NE	NE	Tradis
PA1052	PA1052	Hypothetical unclassified	Tradis	NE	NE	Tradis
PA1105	fliJ	cell wall LPS capsule/ motility	Tradis	NE	NE	Tradis
PA1262	PA1262	membrane/ transport small molecules	Tradis	NE	NE	Tradis
PA1272	cobO	biosynthesis cofactors prosthetic groups and carriers	Tradis	NE	NE	Tradis
PA1653	PA1653	transcriptional regulator	Tradis	NE	NE	Tradis
PA1694	pscQ	protein secretion and export	Tradis	NE	NE	Tradis
PA1707	pcrH	protein secretion and export/ secreted factors	Tradis	NE	NE	Tradis
PA1917	PA1917	Hypothetical unclassified	Tradis	NE	NE	Tradis
PA1973	pqqF	biosynthesis cofactors prosthetic groups and carriers	Tradis	NE	NE	Tradis
PA1995	PA1995	Hypothetical unclassified	Tradis	NE	NE	Tradis
PA2076	PA2076	transcriptional regulator	Tradis	NE	NE	Tradis
PA2170	PA2170	Hypothetical unclassified	Tradis	NE	NE	Tradis
PA2171	PA2171	Hypothetical unclassified	Tradis	NE	NE	Tradis
PA2277	arsR	transcriptional regulator	Tradis	NE	NE	Tradis
PA2286	PA2286	membrane	Tradis	NE	NE	Tradis
PA2316	PA2316	transcriptional regulator	Tradis	NE	NE	Tradis
PA2352	PA2352	putative enzyme	Tradis	NE	NE	Tradis
PA2451	PA2451	Hypothetical unclassified	Tradis	NE	NE	Tradis
PA2496	PA2496	Hypothetical unclassified	Tradis	NE	NE	Tradis
PA2499	PA2499	putative enzyme	Tradis	NE	NE	Tradis
PA2509	catB	carbon compound catabolism	Tradis	NE	NE	Tradis
PA3074	PA3074	Hypothetical unclassified	Both	NE	NE	Tradis
PA3314	PA3314	transport small molecules	Tradis	NE	NE	Tradis
PA3466	PA3466	transcription RNA processing and degredation	Tradis	NE	NE	Tradis
PA3569	mmsB	carbon compound catabolism	Tradis	NE	NE	Tradis
PA3638	PA3638	Hypothetical unclassified	Tradis	NE	NE	Tradis
PA3777	xseA	DNA replication and repair	Tradis	NE	NE	Tradis
PA3881	PA3881	Hypothetical unclassified	Tradis	NE	NE	Tradis
PA4220	PA4220	Hypothetical unclassified	Tradis	NE	NE	Tradis
PA4729	panB	biosynthesis cofactors prosthetic groups and carriers	Tradis	NE	NE	Tradis
PA4789	PA4789	Hypothetical unclassified	Tradis	NE	NE	Tradis
PA4884	PA4884	Hypothetical unclassified	Tradis	NE	NE	Tradis
PA0212	mdcE	carbon compound catabolism	Tradis	Tradis	NE	Tradis
PA0583	PA0583	biosynthesis cofactors prosthetic groups and carriers	Tradis	Tradis	NE	Tradis
PA0814	PA0814	Hypothetical unclassified	Tradis	Tradis	NE	Tradis
PA0905.3	PA0905.3	noncoding	Tradis	Tradis	NE	Tradis
PA0966	ruvA	DNA replication and repair	Tradis	Tradis	NE	Tradis
PA1057	shaD	membrane/ transport small molecules	Tradis	Tradis	NE	Tradis
PA1160	PA1160	Hypothetical unclassified	Tradis	Tradis	NE	Tradis
PA1177	napE	energy metabolism	Tradis	Tradis	NE	Tradis
PA1277	cobQ	biosynthesis cofactors prosthetic groups and carriers	Tradis	Tradis	NE	Tradis
PA1503	PA1503	Hypothetical unclassified	Tradis	Tradis	NE	Tradis
PA1641	PA1641	Hypothetical unclassified	Tradis	Tradis	NE	Tradis
PA1696	pscO	protein secretion and export	Tradis	Tradis	NE	Tradis
PA1816	dnaQ	nucleotide biosynthesis and metabolism	Tradis	Tradis	NE	Tradis
PA1885	PA1885	putative enzyme	Tradis	Tradis	NE	Tradis
PA2000	dchB	amino acid metabolism and biosynthesis/ carbon compound catabolism	Tradis	Tradis	NE	Tradis
PA2027	PA2027	Hypothetical unclassified	Tradis	Tradis	NE	Tradis
PA2087	PA2087	Hypothetical unclassified	Tradis	Tradis	NE	Tradis
PA2092	PA2092	membrane/ transport small molecules	Tradis	Tradis	NE	Tradis
PA2156	PA2156	Hypothetical unclassified	Tradis	Tradis	NE	Tradis
PA2176	PA2176	Hypothetical unclassified	Tradis	Tradis	NE	Tradis
PA2186	PA2186	Hypothetical unclassified	Tradis	Tradis	NE	Tradis
PA2206	PA2206	transcriptional regulator	Tradis	Tradis	NE	Tradis
PA2259	ptxS	transcriptional regulator	Tradis	Tradis	NE	Tradis
PA2297	PA2297	energy metabolism	Tradis	Tradis	NE	Tradis
PA2355	PA2355	putative enzyme	Tradis	Tradis	NE	Tradis
PA2362	dotU3	Hypothetical unclassified	Tradis	Tradis	NE	Tradis
PA2383	PA2383	transcriptional regulator	Tradis	Tradis	NE	Tradis
PA2410	fpvF	transport small molecules	Tradis	Tradis	NE	Tradis
PA2434	PA2434	Hypothetical unclassified	Tradis	Tradis	NE	Tradis
PA2506	PA2506	Hypothetical unclassified	Tradis	Tradis	NE	Tradis
PA2560	PA2560	Hypothetical unclassified	Tradis	Tradis	NE	Tradis
PA2738	himA	DNA replication and repair/ transcription RNA processing and degradation/ translation and post-translational modification	Tradis	Tradis	NE	Tradis
PA2970	rpmF	translation and post translational modification	Tradis	Tradis	NE	Tradis
PA2983	PA2983	transport small molecules	Tradis	Tradis	NE	Tradis
PA3151	hisF2	amino acid metabolism and biosynthesis	Tradis	Tradis	NE	Tradis
PA3166	pheA	amino acid metabolism and biosynthesis	Tradis	Tradis	NE	Tradis
PA3263	PA3263	Hypothetical unclassified	Tradis	Tradis	NE	Tradis
PA3288	PA3288	Hypothetical unclassified	Tradis	Tradis	NE	Tradis
PA3442	PA3442	transport small molecules	Tradis	Tradis	NE	Tradis
PA3507	PA3507	putative enzyme	Tradis	Tradis	NE	Tradis
PA3642	rnhB	DNA replication and repair	Tradis	Tradis	NE	Tradis
PA3939	PA3939	Hypothetical unclassified	Tradis	Tradis	NE	Tradis
PA3941	PA3941	Hypothetical unclassified	Tradis	Tradis	NE	Tradis
PA4018	PA4018	Hypothetical unclassified	Tradis	Tradis	NE	Tradis
PA4139	PA4139	Hypothetical unclassified	Tradis	Tradis	NE	Tradis
PA4219	ampO	antibiotic resistance and susceptibility/ membrane	Tradis	Tradis	NE	Tradis
PA4224	pchG	membrane/ transport small molecules	Tradis	Tradis	NE	Tradis
PA4368	PA4368	Hypothetical unclassified	Tradis	Tradis	NE	Tradis
PA4422	PA4422	Hypothetical unclassified	Tradis	Tradis	NE	Tradis
PA4541.3	PA4541.3	noncoding	Tradis	Tradis	NE	Tradis
PA4558	PA4558	chaperones and heatshock/ translation and post-translational modification	Tradis	Tradis	NE	Tradis
PA4824	PA4824	Hypothetical unclassified	Tradis	Tradis	NE	Tradis
PA4998	PA4998	Hypothetical unclassified	Tradis	Tradis	NE	Tradis
PA5068	tatA	protein secretion and export	Tradis	Tradis	NE	Tradis
PA5069	tatB	protein secretion and export	Tradis	Tradis	NE	Tradis
PA5567	PA5567	putative enzyme	Tradis	Tradis	NE	Tradis
PA2091	PA2091	membrane	Tradis	NE	NE	Both
PA3108	purF	amino acid metabolism and biosynthesis/ nucleotide biosynthesis and metabolism	Both	NE	NE	Both
PA2991	sth	nucleotide biosynthesis and metabolism	Tradis	Tradis	NE	Both
PA1990	pqqH	putative enzyme	Both	NE	NE	Transit
PA2152	PA2152	putative enzyme	Transit	NE	NE	Transit
PA2445	gcvP2	amino acid metabolism and biosynthesis/ central intermediary metabolism	Transit	NE	NE	Transit
PA0209	PA0209	putative enzyme	Tradis	NE	Tradis	NE
PA2287	PA2287	Hypothetical unclassified	Tradis	NE	Tradis	NE
PA2314	PA2314	membrane/ transport small molecules	Tradis	NE	Tradis	NE
PA2895	sbrR	transcriptional regulator	Tradis	NE	Tradis	NE
PA3201	PA3201	membrane	Tradis	NE	Tradis	NE
PA3395	nosY	energy metabolism/ membrane	Tradis	NE	Tradis	NE
PA4158	fepC	transport small molecules	Tradis	NE	Tradis	NE
PA0489	PA0489	putative enzyme	Tradis	Tradis	Tradis	NE
PA1827	PA1827	putative enzyme	Tradis	Tradis	Tradis	NE
PA3050	pyrD	nucleotide biosynthesis and metabolism	Tradis	Tradis	Tradis	NE
PA3352	PA3352	Hypothetical unclassified	Tradis	Tradis	Tradis	NE
PA5062	PA5062	Hypothetical unclassified	Tradis	Tradis	Tradis	NE
PA0850	PA0850	Hypothetical unclassified	Tradis	NE	Tradis	Tradis
PA2112	PA2112	Hypothetical unclassified	Tradis	NE	Tradis	Tradis
PA2405	fpvJ	Hypothetical unclassified	Tradis	NE	Tradis	Tradis
PA2805	PA2805	Hypothetical unclassified	Tradis	NE	Tradis	Tradis
PA4395	PA4395	Hypothetical unclassified	Tradis	NE	Tradis	Tradis
PA5320	coaC	biosynthesis cofactors prosthetic groups and carriers/ DNA replication and repair	Tradis	NE	Tradis	Tradis
PA0187	PA0187	Hypothetical unclassified	Tradis	Tradis	Tradis	Tradis
PA0210	mdcC	carbon compound catabolism	Tradis	Tradis	Tradis	Tradis
PA0802	PA0802	membrane	Tradis	Tradis	Tradis	Tradis
PA1010	dapA	amino acid metabolism and biosynthesis	Tradis	Tradis	Tradis	Tradis
PA1042	PA1042	membrane	Tradis	Tradis	Tradis	Tradis
PA1059	shaF	membrane/ transport small molecules	Tradis	Tradis	Tradis	Tradis
PA1133	PA1133	Hypothetical unclassified	Tradis	Tradis	Tradis	Tradis
PA1176	napF	energy metabolism	Tradis	Tradis	Tradis	Tradis
PA1264	NA	transcriptional regulator	Tradis	Tradis	Tradis	Tradis
PA1685	masA	amino acid metabolism and biosynthesis	Tradis	Tradis	Tradis	Tradis
PA1704	pcrR	transcriptional regulator	Tradis	Tradis	Tradis	Tradis
PA1715	pscB	protein secretion and export	Tradis	Tradis	Tradis	Tradis
PA1908	PA1908	membrane/ transport small molecules	Tradis	Tradis	Tradis	Tradis
PA1924	PA1924	Hypothetical unclassified	Tradis	Tradis	Tradis	Tradis
PA1988	pqqD	biosynthesis cofactors prosthetic groups and carriers	Tradis	Tradis	Tradis	Tradis
PA2261	PA2261	carbon compound catabolism	Tradis	Tradis	Tradis	Tradis
PA2299	PA2299	transcriptional regulator	Tradis	Tradis	Tradis	Tradis
PA2330	PA2330	Hypothetical unclassified	Tradis	Tradis	Tradis	Tradis
PA2331	PA2331	membrane	Tradis	Tradis	Tradis	Tradis
PA2368	hsiF3	Hypothetical unclassified	Tradis	Tradis	Tradis	Tradis
PA2375	PA2375	membrane	Tradis	Tradis	Tradis	Tradis
PA2436	PA2436	Hypothetical unclassified	Tradis	Tradis	Tradis	Tradis
PA2851	efp	translation and post translational modification	Tradis	Tradis	Tradis	Tradis
PA2876	pyrF	nucleotide biosynthesis and metabolism	Tradis	Tradis	Tradis	Tradis
PA2910	PA2910	membrane	Tradis	Tradis	Tradis	Tradis
PA2916	PA2916	membrane	Tradis	Tradis	Tradis	Tradis
PA3005	nagZ	amino acid metabolism and biosynthesis/ antibiotic resistance and susceptibility	Tradis	Tradis	Tradis	Tradis
PA3133.3	PA3133.3	noncoding	Tradis	Tradis	Tradis	Tradis
PA3952	PA3952	Hypothetical unclassified	Tradis	Tradis	Tradis	Tradis
PA4457	PA4457	secreted factors	Tradis	Tradis	Tradis	Tradis
PA4531	PA4531	Hypothetical unclassified	Tradis	Tradis	Tradis	Tradis
PA4673.1	PA4673.1	noncoding	Tradis	Tradis	Tradis	Tradis
PA5160.1	PA5160.1	noncoding	Tradis	Tradis	Tradis	Tradis
PA5406	PA5406	Hypothetical unclassified	Tradis	Tradis	Tradis	Tradis
PA5426	purE	nucleotide biosynthesis and metabolism	Tradis	Tradis	Tradis	Tradis
PA3527	pyrC	nucleotide biosynthesis and metabolism	Tradis	NE	Both	Tradis
PA0002	dnaN	DNA replication and repair	Tradis	Tradis	Both	Tradis
PA0580	gcp	translation and post translational modification	Tradis	Tradis	Both	Tradis
PA0768	lepB	protein secretion and export/ translation and post-translational modification	Tradis	Tradis	Both	Tradis
PA4854	purH	nucleotide biosynthesis and metabolism	Both	NE	Both	Both
PA2342	mtlD	carbon compound catabolism	Tradis	NE	Transit	NE
PA3420	PA3420	transcriptional regulator	Both	NE	Transit	NE
PA4165	PA4165	transcriptional regulator	Tradis	NE	Transit	NE
PA5001	ssg	Hypothetical unclassified	Tradis	NE	Transit	NE
PA2516	xylZ	carbon compound catabolism/ energy metabolism	Tradis	Tradis	Transit	NE
PA1275	cobD	biosynthesis cofactors prosthetic groups and carriers	Tradis	Tradis	Transit	Tradis
PA4760	dnaJ	adaptation and protection/ chaperones and heatshock/ DNA replication and repair	Tradis	Tradis	Transit	Tradis
PA5004	wapH	putative enzyme	Tradis	Tradis	Transit	Tradis
PA5366	pstB	membrane/ transport small molecules	Tradis	Tradis	Transit	Tradis
PA4855	purD	nucleotide biosynthesis and metabolism	Tradis	NE	Transit	Both
PA5015	aceE	amino acid metabolism and biosynthesis/ energy metabolism	Transit	Both	Transit	Both
PA1976	ercS'	two component regulator	Transit	NA	Transit	Transit
PA4758	carA	amino acid metabolism and biosynthesis/ nucleotide biosynthesis and metabolism	Tradis	Tradis	Transit	Transit
PA5565	gidA	cell division	Tradis	Tradis	Transit	Transit
PA1549	PA1549	membrane/ transport small molecules	Both	Both	Transit	Transit
PA4225	pchF	secreted factors/ transport small molecules	Transit	Transit	Transit	Transit

## Sheet: Essential_Skin
Dataset 2-C: Genes determined to be conditionally required for survival in P. aeruginosa grown in a skin organoid model that were not important for growth in MHB. Gene essentiality was determined using two analysis tools Tradis and Transit and compared to genes determined to be conditionally important for survival in RPMI/Serum, RPMI, and a murine abscess model. NE indicates gene was not essentia…
locus Tag	Gene Name	Functional class	Essential in
			Skin	RPMI/Serum	RPMI	Abscess
PA0002	dnaN	DNA replication and repair	Tradis	Both	Tradis	Tradis
PA0005	lptA	FA and phospholipid metabolism	Tradis	NE	NE	NE
PA0021	PA0021	membrane	Tradis	NE	NE	NE
PA0059	osmC	adaptation and protection	Tradis	NE	NE	NE
PA0075	pppA	protein secretion and export	Tradis	NE	NE	NE
PA0135	PA0135	Hypothetical unclassified	Tradis	NE	Tradis	NE
PA0149	PA0149	transcriptional regulator	Tradis	NE	NE	NE
PA0157	triB	antibiotic resistance and susceptibility/ membrane	Tradis	NE	Tradis	NE
PA0168	PA0168	Hypothetical unclassified	Tradis	NE	NE	NE
PA0187	PA0187	Hypothetical unclassified	Tradis	Tradis	Tradis	Tradis
PA0210	mdcC	carbon compound catabolism	Tradis	Tradis	Tradis	Tradis
PA0212	mdcE	carbon compound catabolism	Tradis	NE	Tradis	Tradis
PA0244	PA0244	putative enzyme	Tradis	NE	NE	NE
PA0245	aroQ2	amino acid metabolism and biosynthesis	Tradis	NE	NE	NE
PA0253	hudR	transcriptional regulator	Tradis	NE	NE	NE
PA0332	PA0332	Hypothetical unclassified	Tradis	NE	NE	Tradis
PA0351	PA0351	Hypothetical unclassified	Tradis	NE	NE	NE
PA0403	pyrR	nucleotide biosynthesis and metabolism/ transcriptional regulator	Tradis	NE	NE	NE
PA0424	mexR	transcriptional regulator	Tradis	NE	NE	Tradis
PA0467	PA0467	Hypothetical unclassified	Tradis	NE	Tradis	NE
PA0489	PA0489	putative enzyme	Tradis	Tradis	NE	Tradis
PA0513	nirG	biosynthesis cofactors prosthetic groups and carriers/ energy metabolism/ transcriptional regulator	Tradis	NE	NE	NE
PA0553	PA0553	Hypothetical unclassified	Tradis	NE	NE	Tradis
PA0580	gcp	translation and post translational modification	Tradis	Both	Tradis	Tradis
PA0583	PA0583	biosynthesis cofactors prosthetic groups and carriers	Tradis	NE	Tradis	Tradis
PA0597	PA0597	putative enzyme	Tradis	NE	NE	Tradis
PA0624	PA0624	related to phage	Tradis	NE	NE	Tradis
PA0678	hxcU	protein secretion and export	Tradis	NE	NE	Tradis
PA0687	hxcS	protein secretion and export	Tradis	NE	NE	Tradis
PA0694	exbD2	membrane/ transport small molecules	Tradis	NE	NE	NE
PA0700	PA0700	Hypothetical unclassified	Tradis	NE	Tradis	NE
PA0714.1	phrD	noncoding	Tradis	NE	NE	NE
PA0738	PA0738	membrane	Tradis	NE	NE	Tradis
PA0743	PA0743	carbon compound catabolism	Tradis	NE	NE	NE
PA0747	PA0747	putative enzyme	Tradis	NE	NE	NE
PA0760	PA0760	Hypothetical unclassified	Tradis	NE	NE	Tradis
PA0763	mucA	cell wall LPS capsule/ transcriptional regulator	Tradis	NE	NE	NE
PA0768	lepB	protein secretion and export/ translation and post-translational modification	Tradis	Both	Tradis	Tradis
PA0802	PA0802	membrane	Tradis	Tradis	Tradis	Tradis
PA0814	PA0814	Hypothetical unclassified	Tradis	NE	Tradis	Tradis
PA0853	PA0853	putative enzyme	Tradis	NE	NE	Tradis
PA0905.3	PA0905.3	noncoding	Tradis	NE	Tradis	Tradis
PA0906	alpR	transcriptional regulator	Tradis	NE	NE	Tradis
PA0909	alpC	membrane	Tradis	NE	NE	NE
PA0921	PA0921	membrane	Tradis	NE	NE	NE
PA0965	ruvC	DNA replication and repair	Tradis	NE	NE	Tradis
PA0966	ruvA	DNA replication and repair	Tradis	NE	Tradis	Tradis
PA0967	ruvB	DNA replication and repair	Tradis	NE	NE	Tradis
PA1010	dapA	amino acid metabolism and biosynthesis	Tradis	Tradis	Tradis	Tradis
PA1030.1	P8	noncoding	Tradis	NE	NE	NE
PA1042	PA1042	membrane	Tradis	Tradis	Tradis	Tradis
PA1057	shaD	membrane/ transport small molecules	Tradis	NE	Tradis	Tradis
PA1059	shaF	membrane/ transport small molecules	Tradis	Tradis	Tradis	Tradis
PA1063	PA1063	Hypothetical unclassified	Tradis	NE	NE	NE
PA1075	PA1075	Hypothetical unclassified	Tradis	NE	NE	NE
PA1111	PA1111	Hypothetical unclassified	Tradis	NE	NE	Tradis
PA1133	PA1133	Hypothetical unclassified	Tradis	Tradis	Tradis	Tradis
PA1159	PA1159	adaptation and protection/ transcriptional regulator	Tradis	NE	Tradis	NE
PA1160	PA1160	Hypothetical unclassified	Tradis	NE	Tradis	Tradis
PA1176	napF	energy metabolism	Tradis	Tradis	Tradis	Tradis
PA1177	napE	energy metabolism	Tradis	NE	Tradis	Tradis
PA1240	PA1240	putative enzyme	Tradis	NE	NE	NE
PA1263	PA1263	Hypothetical unclassified	Tradis	NE	NE	Tradis
PA1264	PA1264	transcriptional regulator	Tradis	Tradis	Tradis	Tradis
PA1267	lhpB	amino acid metabolism and biosynthesis	Tradis	NE	Tradis	NE
PA1275	cobD	biosynthesis cofactors prosthetic groups and carriers	Tradis	Transit	Tradis	Tradis
PA1276	cobC	biosynthesis cofactors prosthetic groups and carriers	Tradis	NE	Tradis	NE
PA1277	cobQ	biosynthesis cofactors prosthetic groups and carriers	Tradis	NE	Tradis	Tradis
PA1300	PA1300	transcriptional regulator	Tradis	NE	NE	NE
PA1314	PA1314	Hypothetical unclassified	Tradis	Tradis	Tradis	NE
PA1328	PA1328	transcriptional regulator	Tradis	NE	NE	NE
PA1349	PA1349	Hypothetical unclassified	Tradis	NE	NE	NE
PA1377	PA1377	Hypothetical unclassified	Tradis	NE	NE	NE
PA1401	PA1401	Hypothetical unclassified	Tradis	NE	NE	Tradis
PA1454	fleN	motility	Tradis	NE	NE	NE
PA1463	PA1463	Hypothetical unclassified	Tradis	NE	NE	Tradis
PA1486	bapF	amino acid metabolism and biosynthesis	Tradis	NE	NE	Tradis
PA1492	PA1492	Hypothetical unclassified	Tradis	NE	NE	Tradis
PA1503	PA1503	Hypothetical unclassified	Tradis	NE	Tradis	Tradis
PA1540	PA1540	membrane	Tradis	NE	NE	NE
PA1547	PA1547	membrane	Tradis	NE	NE	Tradis
PA1548	PA1548	Hypothetical unclassified	Tradis	NE	NE	Tradis
PA1549	PA1549	membrane/ transport small molecules	Both	Transit	Transit	Both
PA1558	PA1558	Hypothetical unclassified	Tradis	NE	NE	Tradis
PA1580	gltA	energy metabolism	Tradis	NE	NE	NE
PA1614	gpsA	central intermediary metabolism/ FA and phospholipid metabolism	Tradis	NE	NE	NE
PA1641	PA1641	Hypothetical unclassified	Tradis	NE	Tradis	Tradis
PA1685	masA	amino acid metabolism and biosynthesis	Tradis	Tradis	Tradis	Tradis
PA1692	PA1692	protein secretion and export	Tradis	NE	NE	NE
PA1696	pscO	protein secretion and export	Tradis	NE	Tradis	Tradis
PA1704	pcrR	transcriptional regulator	Tradis	Tradis	Tradis	Tradis
PA1708	popB	protein secretion and export	Tradis	NE	NE	NE
PA1715	pscB	protein secretion and export	Tradis	Tradis	Tradis	Tradis
PA1766	PA1766	Hypothetical unclassified	Tradis	NE	NE	Tradis
PA1781.1	nalA	noncoding	Tradis	NE	NE	NE
PA1793	ppiB	chaperones and heatshock/ translation and post-translational modification	Tradis	NE	NE	Tradis
PA1801	clpP	cell wall LPS capsule/ chaperones and heatshock/ motility/ antibiotic resistance and susceptibility	Tradis	NE	NE	NE
PA1816	dnaQ	nucleotide biosynthesis and metabolism	Tradis	NE	Tradis	Tradis
PA1827	PA1827	putative enzyme	Tradis	Tradis	NE	Tradis
PA1842	PA1842	Hypothetical unclassified	Tradis	NE	NE	Tradis
PA1885	PA1885	putative enzyme	Tradis	NE	Tradis	Tradis
PA1908	PA1908	membrane/ transport small molecules	Tradis	Tradis	Tradis	Tradis
PA1924	PA1924	Hypothetical unclassified	Tradis	Tradis	Tradis	Tradis
PA1936	PA1936	Hypothetical unclassified	Tradis	NE	NE	NE
PA1988	pqqD	biosynthesis cofactors prosthetic groups and carriers	Tradis	Tradis	Tradis	Tradis
PA2000	dchB	amino acid metabolism and biosynthesis/ carbon compound catabolism	Tradis	NE	Tradis	Tradis
PA2007	maiA	carbon compound catabolism	Tradis	NE	NE	NE
PA2008	fahA	carbon compound catabolism	Tradis	NE	Tradis	NE
PA2027	PA2027	Hypothetical unclassified	Tradis	NE	Tradis	Tradis
PA2031	PA2031	Hypothetical unclassified	Tradis	NE	NE	Tradis
PA2048	PA2048	Hypothetical unclassified	Tradis	NE	NE	NE
PA2087	PA2087	Hypothetical unclassified	Tradis	NE	Tradis	Tradis
PA2092	PA2092	membrane/ transport small molecules	Tradis	NE	Tradis	Tradis
PA2156	PA2156	Hypothetical unclassified	Tradis	NE	Tradis	Tradis
PA2168	PA2168	Hypothetical unclassified	Tradis	NE	NE	NE
PA2175	PA2175	Hypothetical unclassified	Tradis	Tradis	Tradis	NE
PA2176	PA2176	Hypothetical unclassified	Tradis	NE	Tradis	Tradis
PA2186	PA2186	Hypothetical unclassified	Tradis	NE	Tradis	Tradis
PA2187	PA2187	Hypothetical unclassified	Tradis	NE	NE	NE
PA2206	PA2206	transcriptional regulator	Tradis	NE	Tradis	Tradis
PA2224	PA2224	Hypothetical unclassified	Tradis	NE	NE	NE
PA2225	PA2225	Hypothetical unclassified	Tradis	NE	NE	NE
PA2239	pslI	cell wall LPS capsule	Tradis	NE	NE	Tradis
PA2259	ptxS	transcriptional regulator	Tradis	NE	Tradis	Tradis
PA2261	PA2261	carbon compound catabolism	Tradis	Tradis	Tradis	Tradis
PA2273	soxR	transcriptional regulator	Tradis	NE	NE	Tradis
PA2297	PA2297	energy metabolism	Tradis	NE	Tradis	Tradis
PA2299	PA2299	transcriptional regulator	Tradis	Tradis	Tradis	Tradis
PA2305	ambB	secreted factors	Transit	NE	Transit	NE
PA2315	PA2315	Hypothetical unclassified	Tradis	NE	NE	NE
PA2330	PA2330	Hypothetical unclassified	Tradis	Tradis	Tradis	Tradis
PA2331	PA2331	membrane	Tradis	Tradis	Tradis	Tradis
PA2346	PA2346	putative enzyme	Tradis	Transit	Tradis	NE
PA2355	PA2355	putative enzyme	Tradis	NE	Tradis	Tradis
PA2362	dotU3	Hypothetical unclassified	Tradis	NE	Tradis	Tradis
PA2368	hsiF3	Hypothetical unclassified	Tradis	Tradis	Tradis	Tradis
PA2375	PA2375	membrane	Tradis	Tradis	Tradis	Tradis
PA2381	PA2381	Hypothetical unclassified	Tradis	NE	Tradis	NE
PA2383	PA2383	transcriptional regulator	Tradis	NE	Tradis	Tradis
PA2384	PA2384	Hypothetical unclassified	Tradis	NE	NE	Tradis
PA2406	fpvK	Hypothetical unclassified	Tradis	NE	NE	Tradis
PA2410	fpvF	transport small molecules	Tradis	NE	Tradis	Tradis
PA2412	PA2412	Hypothetical unclassified	Tradis	NE	NE	Tradis
PA2422	PA2422	Hypothetical unclassified	Tradis	NE	NE	NE
PA2424	pvdL	adaptation and protection	Transit	NE	NE	NE
PA2434	PA2434	Hypothetical unclassified	Tradis	NE	Tradis	Tradis
PA2436	PA2436	Hypothetical unclassified	Tradis	Tradis	Tradis	Tradis
PA2442	gcvT2	amino acid metabolism and biosynthesis/ central intermediary metabolism	Tradis	NE	NE	Tradis
PA2452	PA2452	Hypothetical unclassified	Tradis	NE	NE	NE
PA2461	PA2461	Hypothetical unclassified	Tradis	NE	NE	NE
PA2506	PA2506	Hypothetical unclassified	Tradis	NE	Tradis	Tradis
PA2515	xylL	carbon compound catabolism	Tradis	NE	NE	NE
PA2516	xylZ	carbon compound catabolism/ energy metabolism	Tradis	Transit	NE	Tradis
PA2542	PA2542	Hypothetical unclassified	Transit	Transit	Transit	NE
PA2558	PA2558	membrane/ transport small molecules	Tradis	NE	NE	NE
PA2560	PA2560	Hypothetical unclassified	Tradis	NE	Tradis	Tradis
PA2703	tsi2	adaptation and protection	Tradis	NE	NE	Tradis
PA2710	PA2710	membrane	Tradis	NE	NE	NE
PA2720	PA2720	Hypothetical unclassified	Tradis	NE	NE	NE
PA2724	PA2724	Hypothetical unclassified	Tradis	NE	NE	Tradis
PA2733	PA2733	Hypothetical unclassified	Tradis	NE	NE	Tradis
PA2738	himA	DNA replication and repair/ transcription RNA processing and degradation, translation and post-translational modification	Tradis	NE	Tradis	Tradis
PA2819.1	PA2819.1	noncoding	Tradis	NE	Tradis	NE
PA2830	htpX	adaptation and protection	Tradis	NE	NE	NE
PA2845	PA2845	Hypothetical unclassified	Tradis	NE	NE	NE
PA2847	PA2847	Hypothetical unclassified	Tradis	NE	NE	NE
PA2851	efp	translation and post translational modification	Tradis	Tradis	Tradis	Tradis
PA2876	pyrF	nucleotide biosynthesis and metabolism	Tradis	Tradis	Tradis	Tradis
PA2881	PA2881	transcriptional regulator/ two component regulator	Tradis	NE	NE	NE
PA2890	atuE	putative enzyme	Tradis	NE	Tradis	NE
PA2901	PA2901	Hypothetical unclassified	Tradis	NE	NE	NE
PA2910	PA2910	membrane	Tradis	Tradis	Tradis	Tradis
PA2916	PA2916	membrane	Tradis	Tradis	Tradis	Tradis
PA2920	PA2920	adaptation and protection/ chemotaxis	Tradis	NE	NE	Tradis
PA2933	PA2933	membrane/ transport small molecules	Tradis	NE	NE	Tradis
PA2947	cobE	biosynthesis cofactors prosthetic groups and carriers	Tradis	NE	NE	NE
PA2964	pabC	biosynthesis cofactors prosthetic groups and carriers	Tradis	NE	NE	Tradis
PA2965	fabF1	FA and phospholipid metabolism	Tradis	NE	NE	Tradis
PA2970	rpmF	translation and post translational modification	Tradis	NE	Tradis	Tradis
PA2972	PA2972	Hypothetical unclassified	Tradis	NE	NE	Tradis
PA2983	PA2983	transport small molecules	Tradis	NE	Tradis	Tradis
PA2991	sth	nucleotide biosynthesis and metabolism	Tradis	NE	Both	Tradis
PA3005	nagZ	amino acid metabolism and biosynthesis/ antibiotic resistance and susceptibilty/ putative enzyme	Tradis	Tradis	Tradis	Tradis
PA3016	PA3016	Hypothetical unclassified	Tradis	NE	NE	NE
PA3050	pyrD	nucleotide biosynthesis and metabolism	Tradis	Tradis	NE	Tradis
PA3071	PA3071	Hypothetical unclassified	Tradis	NE	Tradis	NE
PA3109	PA3109	adaptation and protection	Tradis	NE	NE	NE
PA3131	PA3131	carbon compound catabolism/ central intermediary metabolism	Tradis	NE	NE	NE
PA3133.2	PA3133.2	noncoding	Tradis	NE	NE	NE
PA3133.3	PA3133.3	noncoding	Tradis	Tradis	Tradis	Tradis
PA3144	PA3144	related to phage	Tradis	NE	NE	NE
PA3151	hisF2	amino acid metabolism and biosynthesis	Tradis	NE	Tradis	Tradis
PA3166	pheA	amino acid metabolism and biosynthesis	Tradis	NE	Tradis	Tradis
PA3197	PA3197	Hypothetical unclassified	Tradis	NE	NE	Tradis
PA3198	PA3198	Hypothetical unclassified	Tradis	NE	NE	Tradis
PA3259.1	PA3259.1	Hypothetical unclassified	Tradis	NE	NE	Tradis
PA3263	PA3263	Hypothetical unclassified	Tradis	NE	Tradis	Tradis
PA3264	PA3264	membrane/ transport small molecules	Tradis	NE	NE	NE
PA3284	PA3284	Hypothetical unclassified	Tradis	NE	NE	Tradis
PA3288	PA3288	Hypothetical unclassified	Tradis	NE	Tradis	Tradis
PA3304.1	P18	noncoding	Tradis	NE	Tradis	NE
PA3330	PA3330	putative enzyme	Tradis	NE	NE	Tradis
PA3351	flgM	transcriptional regulator	Tradis	NE	NE	NE
PA3352	PA3352	Hypothetical unclassified	Tradis	Tradis	NE	Tradis
PA3354	PA3354	Hypothetical unclassified	Tradis	NE	Tradis	NE
PA3370	PA3370	membrane	Tradis	NE	NE	NE
PA3384	phnC	transport small molecules	Tradis	NE	NE	NE
PA3433	PA3433	transcriptional regulator	Tradis	NE	NE	NE
PA3442	PA3442	transport small molecules	Tradis	NE	Tradis	Tradis
PA3448	PA3448	membrane/ transport small molecules	Tradis	NE	Tradis	NE
PA3480	PA3480	nucleotide biosynthesis and metabolism	Tradis	NE	NE	Tradis
PA3505	PA3505	Hypothetical unclassified	Tradis	Tradis	Tradis	NE
PA3507	PA3507	putative enzyme	Tradis	NE	Tradis	Tradis
PA3510	PA3510	Hypothetical unclassified	Tradis	NE	NE	NE
PA3511	PA3511	putative enzyme	Tradis	NE	NE	NE
PA3520	PA3520	Hypothetical unclassified	Tradis	NE	NE	NE
PA3558	arnF	adaptation and protection/ cell wall LPS capsule/ membrane	Tradis	NE	NE	NE
PA3632	PA3632	Hypothetical unclassified	Tradis	NE	NE	Tradis
PA3642	rnhB	DNA replication and repair	Tradis	NE	Tradis	Tradis
PA3719	armR	antibiotic resistance and susceptibility	Tradis	NE	Tradis	NE
PA3737	dsbC	chaperones and heatshock/ tranlation and post-translational modification	Tradis	NE	NE	NE
PA3742	rplS	translation and post translational modification	Tradis	NE	NE	NE
PA3759	PA3759	putative enzyme	Tradis	NE	NE	NE
PA3800	PA3800	Hypothetical unclassified	Tradis	NE	NE	Tradis
PA3822	PA3822	Hypothetical unclassified	Tradis	NE	NE	NE
PA3832	holC	DNA replication and repair	Tradis	NE	NE	NE
PA3865.1	PA3865.1	adaptation and protection	Tradis	NE	NE	Tradis
PA3900	fecR	membrane/ transcriptional regulator	Tradis	NE	NE	Tradis
PA3939	PA3939	Hypothetical unclassified	Tradis	NE	Tradis	Tradis
PA3941	PA3941	Hypothetical unclassified	Tradis	NE	Tradis	Tradis
PA3952	PA3952	Hypothetical unclassified	Tradis	Tradis	Tradis	Tradis
PA4018	PA4018	Hypothetical unclassified	Tradis	NE	Tradis	Tradis
PA4033	mucE	Hypothetical unclassified	Tradis	NE	NE	NE
PA4077	PA4077	transcriptional regulator	Tradis	NE	NE	NE
PA4089	PA4089	putative enzyme	Tradis	NE	NE	Tradis
PA4139	PA4139	Hypothetical unclassified	Tradis	NE	Tradis	Tradis
PA4202	nmoA	putative enzyme	Tradis	NE	NE	Tradis
PA4219	ampO	membrane/ antibiotic resistance and susceptibility	Tradis	NE	Tradis	Tradis
PA4224	pchG	membrane/ transport small molecules	Tradis	NE	Tradis	Tradis
PA4225	pchF	secreted factors/ transport small molecules	Transit	Transit	Transit	Transit
PA4299	tadD	motility	Tradis	NE	Tradis	NE
PA4335	PA4335	Hypothetical unclassified	Tradis	NE	NE	NE
PA4368	PA4368	Hypothetical unclassified	Tradis	NE	Tradis	Tradis
PA4392	PA4392	Hypothetical unclassified	Tradis	NE	NE	NE
PA4393	ampG	antibiotic resistance and susceptibility/ transport small molecules	Both	NE	NE	NE
PA4394	PA4394	Hypothetical unclassified	Tradis	NE	NE	NE
PA4420	PA4420	Hypothetical unclassified	Tradis	NE	NE	NE
PA4422	PA4422	Hypothetical unclassified	Tradis	NE	Tradis	Tradis
PA4452	PA4452	Hypothetical unclassified	Tradis	NE	NE	Tradis
PA4457	PA4457	secreted factors	Tradis	Tradis	Tradis	Tradis
PA4464	ptsN	transport small molecules	Tradis	NE	Tradis	NE
PA4476	PA4476	Hypothetical unclassified	Transit	NE	NE	NE
PA4530	PA4530	Hypothetical unclassified	Tradis	NE	NE	NE
PA4531	PA4531	Hypothetical unclassified	Tradis	Tradis	Tradis	Tradis
PA4534	PA4534	Hypothetical unclassified	Tradis	NE	NE	Tradis
PA4541.1	PA4541.1	noncoding	Tradis	NE	NE	NE
PA4541.3	PA4541.3	noncoding	Tradis	NE	Tradis	Tradis
PA4558	PA4558	chaperones and heatshock/ translation and post-translational modification	Tradis	NE	Tradis	Tradis
PA4585	rtcA	transcription RNA processing and degredation	Tradis	NE	NE	Tradis
PA4594	PA4594	transport small molecules	Tradis	NE	NE	NE
PA4626	hprA	central intermediary metabolism	Tradis	NE	NE	Tradis
PA4637	PA4637	Hypothetical unclassified	Tradis	NE	NE	NE
PA4671	PA4671	adaptation and protection/ translation and post-translational modification	Tradis	NE	NE	NE
PA4672	PA4672	translation and post translational modification	Tradis	NE	Tradis	NE
PA4673.1	PA4673.1	noncoding	Tradis	Tradis	Tradis	Tradis
PA4705	phuW	Hypothetical unclassified	Tradis	NE	NE	NE
PA4714	PA4714	Hypothetical unclassified	Tradis	NE	NE	NE
PA4746.1	PA4746.1	noncoding	Tradis	NE	NE	NE
PA4758	carA	nucleotide biosynthesis and metabolism/amino acid metabolism and biosynthesis	Tradis	Transit	Transit	Tradis
PA4760	dnaJ	adaptation and protection/ DNA replication and repair/ chaperones and heatshock	Tradis	Transit	Tradis	Tradis
PA4816	PA4816	Hypothetical unclassified	Tradis	NE	NE	Tradis
PA4822	PA4822	membrane	Tradis	NE	Tradis	NE
PA4824	PA4824	Hypothetical unclassified	Tradis	NE	Tradis	Tradis
PA4841	PA4841	Hypothetical unclassified	Tradis	NE	Tradis	NE
PA4844	ctpL	adaptation and protection/ chemotaxis	Transit	NE	NE	Transit
PA4853	fis	DNA replication and repair/ transcription RNA processing and degradation/ transcriptional regulator	Tradis	NE	Tradis	NE
PA4895	PA4895	membrane/ transcriptional regulator	Tradis	NE	Tradis	NE
PA4896	PA4896	transcriptional regulator	Tradis	NE	NE	Tradis
PA4906	PA4906	transcriptional regulator	Tradis	NE	NE	NE
PA4932	rplI	translation and post translational modification	Tradis	NE	NE	NE
PA4951	orn	transcription RNA processing and degredation	Tradis	NE	NE	Tradis
PA4962	PA4962	membrane	Tradis	NE	NE	Tradis
PA4966	PA4966	Hypothetical unclassified	Tradis	NE	NE	Tradis
PA4998	PA4998	Hypothetical unclassified	Tradis	NE	Tradis	Tradis
PA4999	waaL	membrane	Tradis	NE	Tradis	NE
PA5004	wapH	putative enzyme	Tradis	Transit	Tradis	Tradis
PA5015	aceE	amino acid metabolism and biosynthesis/ energy metabolism	Both	Transit	Both	Transit
PA5016	aceF	carbon compound catabolism/ energy metabolism	Tradis	NE	NE	NE
PA5053	hslV	chaperones and heatshock	Tradis	NE	NE	NE
PA5062	PA5062	Hypothetical unclassified	Tradis	Tradis	NE	Tradis
PA5068	tatA	protein secretion and export	Tradis	NE	Tradis	Tradis
PA5069	tatB	protein secretion and export	Tradis	NE	Tradis	Tradis
PA5070	tatC	membrane/ transport small molecules	Tradis	NE	NE	Tradis
PA5160.1	PA5160.1	noncoding	Tradis	Tradis	Tradis	Tradis
PA5198	PA5198	Hypothetical unclassified	Tradis	NE	NE	Tradis
PA5212	PA5212	Hypothetical unclassified	Tradis	NE	NE	NE
PA5246	PA5246	Hypothetical unclassified	Tradis	NE	NE	NE
PA5288	glnK	antibiotic resistance and susceptibility/ central intermediary metabolism	Tradis	NE	NE	NE
PA5290	PA5290	Hypothetical unclassified	Tradis	NE	NE	NE
PA5345	recG	DNA replication and repair/ transcriptional regulator	Transit	NE	NE	Transit
PA5350	rubA2	carbon compound catabolism	Tradis	NE	Tradis	NE
PA5366	pstB	membrane/ transport small molecules	Tradis	Transit	Tradis	Tradis
PA5401	PA5401	Hypothetical unclassified	Tradis	NE	NE	Tradis
PA5403	PA5403	transcriptional regulator	Tradis	NE	NE	NE
PA5406	PA5406	Hypothetical unclassified	Tradis	Tradis	Tradis	Tradis
PA5426	purE	nucleotide biosynthesis and metabolism	Tradis	Tradis	Tradis	Tradis
PA5469	PA5469	membrane	Tradis	NE	NE	NE
PA5480	PA5480	Hypothetical unclassified	Tradis	NE	NE	NE
PA5563	soj	cell division	Tradis	NE	NE	Tradis
PA5565	gidA	cell division	Tradis	Transit	Transit	Tradis
PA5567	PA5567	putative enzyme	Tradis	NE	Tradis	Tradis

## Sheet: Shared_Essential
Dataset 2-D: 210 genes determined to be conditionally required for survival in P. aeruginosa grown in vitro in either physiologically relevant media condition as well as murine abscess and a skin organoid model that were not important for growth in MHB. Gene essentiality was determined using two analysis tools Tradis and Transit. NE indicates gene was not essential in that condition.
Locus Tag	Gene Name	Functional Class	Essential in
			RPMI/serum	RPMI	Abscess	Skin
PA0002	dnaN	DNA replication and repair	Both	Tradis	Tradis	Tradis
PA0187	PA0187	Hypothetical unclassified	Tradis	Tradis	Tradis	Tradis
PA0210	mdcC	carbon compound catabolism	Tradis	Tradis	Tradis	Tradis
PA0212	mdcE	carbon compound catabolism	NE	Tradis	Tradis	Tradis
PA0489	PA0489	putative enzyme	Tradis	NE	Tradis	Tradis
PA0580	gcp	translation and post translational modification	Both	Tradis	Tradis	Tradis
PA0583	PA0583	biosynthesis cofactors prosthetic groups and carriers	NE	Tradis	Tradis	Tradis
PA0768	lepB	protein secretion and export/ translation and post-translational modification	Both	Tradis	Tradis	Tradis
PA0802	PA0802	membrane	Tradis	Tradis	Tradis	Tradis
PA0814	PA0814	Hypothetical unclassified	NE	Tradis	Tradis	Tradis
PA0905.3	PA0905.3	noncoding	NE	Tradis	Tradis	Tradis
PA0966	ruvA	DNA replication and repair	NE	Tradis	Tradis	Tradis
PA1010	dapA	amino acid metabolism and biosynthesis	Tradis	Tradis	Tradis	Tradis
PA1042	PA1042	membrane	Tradis	Tradis	Tradis	Tradis
PA1057	shaD	membrane/ transport small molecules	NE	Tradis	Tradis	Tradis
PA1059	shaF	membrane/ transport small molecules	Tradis	Tradis	Tradis	Tradis
PA1133	PA1133	Hypothetical unclassified	Tradis	Tradis	Tradis	Tradis
PA1160	PA1160	Hypothetical unclassified	NE	Tradis	Tradis	Tradis
PA1176	napF	energy metabolism	Tradis	Tradis	Tradis	Tradis
PA1177	napE	energy metabolism	NE	Tradis	Tradis	Tradis
PA1264	PA1264	transcriptional regulator	Tradis	Tradis	Tradis	Tradis
PA1275	cobD	biosynthesis cofactors prosthetic groups and carriers	Transit	Tradis	Tradis	Tradis
PA1277	cobQ	biosynthesis cofactors prosthetic groups and carriers	NE	Tradis	Tradis	Tradis
PA1503	PA1503	Hypothetical unclassified	NE	Tradis	Tradis	Tradis
PA1549	PA1549	membrane/ transport small molecules	Transit	Transit	Both	Both
PA1641	PA1641	Hypothetical unclassified	NE	Tradis	Tradis	Tradis
PA1685	masA	amino acid metabolism and biosynthesis	Tradis	Tradis	Tradis	Tradis
PA1696	pscO	protein secretion and export	NE	Tradis	Tradis	Tradis
PA1704	pcrR	transcriptional regulator	Tradis	Tradis	Tradis	Tradis
PA1715	pscB	protein secretion and export	Tradis	Tradis	Tradis	Tradis
PA1816	dnaQ	nucleotide biosynthesis and metabolism	NE	Tradis	Tradis	Tradis
PA1827	PA1827	putative enzyme	Tradis	NE	Tradis	Tradis
PA1885	PA1885	putative enzyme	NE	Tradis	Tradis	Tradis
PA1908	PA1908	membrane/ transport small molecules	Tradis	Tradis	Tradis	Tradis
PA1924	PA1924	Hypothetical unclassified	Tradis	Tradis	Tradis	Tradis
PA1988	pqqD	biosynthesis cofactors prosthetic groups and carriers	Tradis	Tradis	Tradis	Tradis
PA2000	dchB	amino acid metabolism and biosynthesis/ carbon compound catabolism	NE	Tradis	Tradis	Tradis
PA2027	PA2027	Hypothetical unclassified	NE	Tradis	Tradis	Tradis
PA2087	PA2087	Hypothetical unclassified	NE	Tradis	Tradis	Tradis
PA2092	PA2092	membrane/ transport small molecules	NE	Tradis	Tradis	Tradis
PA2156	PA2156	Hypothetical unclassified	NE	Tradis	Tradis	Tradis
PA2176	PA2176	Hypothetical unclassified	NE	Tradis	Tradis	Tradis
PA2186	PA2186	Hypothetical unclassified	NE	Tradis	Tradis	Tradis
PA2206	PA2206	transcriptional regulator	NE	Tradis	Tradis	Tradis
PA2259	ptxS	transcriptional regulator	NE	Tradis	Tradis	Tradis
PA2261	PA2261	carbon compound catabolism	Tradis	Tradis	Tradis	Tradis
PA2297	PA2297	energy metabolism	NE	Tradis	Tradis	Tradis
PA2299	PA2299	transcriptional regulator	Tradis	Tradis	Tradis	Tradis
PA2330	PA2330	Hypothetical unclassified	Tradis	Tradis	Tradis	Tradis
PA2331	PA2331	membrane	Tradis	Tradis	Tradis	Tradis
PA2355	PA2355	putative enzyme	NE	Tradis	Tradis	Tradis
PA2362	dotU3	Hypothetical unclassified	NE	Tradis	Tradis	Tradis
PA2368	hsiF3	Hypothetical unclassified	Tradis	Tradis	Tradis	Tradis
PA2375	PA2375	membrane	Tradis	Tradis	Tradis	Tradis
PA2383	PA2383	transcriptional regulator	NE	Tradis	Tradis	Tradis
PA2410	fpvF	transport small molecules	NE	Tradis	Tradis	Tradis
PA2434	PA2434	Hypothetical unclassified	NE	Tradis	Tradis	Tradis
PA2436	PA2436	Hypothetical unclassified	Tradis	Tradis	Tradis	Tradis
PA2506	PA2506	Hypothetical unclassified	NE	Tradis	Tradis	Tradis
PA2516	xylZ	carbon compound catabolism/ energy metabolism	Transit	NE	Tradis	Tradis
PA2560	PA2560	Hypothetical unclassified	NE	Tradis	Tradis	Tradis
PA2738	himA	DNA replication and repair/ transcription RNA processing and degradation, translation and post-translational modification	NE	Tradis	Tradis	Tradis
PA2851	efp	translation and post translational modification	Tradis	Tradis	Tradis	Tradis
PA2876	pyrF	nucleotide biosynthesis and metabolism	Tradis	Tradis	Tradis	Tradis
PA2910	PA2910	membrane	Tradis	Tradis	Tradis	Tradis
PA2916	PA2916	membrane	Tradis	Tradis	Tradis	Tradis
PA2970	rpmF	translation and post translational modification	NE	Tradis	Tradis	Tradis
PA2983	PA2983	transport small molecules	NE	Tradis	Tradis	Tradis
PA2991	sth	nucleotide biosynthesis and metabolism	NE	Both	Tradis	Tradis
PA3005	nagZ	amino acid metabolism and biosynthesis/ antibiotic resistance and susceptibilty/ putative enzyme	Tradis	Tradis	Tradis	Tradis
PA3050	pyrD	nucleotide biosynthesis and metabolism	Tradis	NE	Tradis	Tradis
PA3133.3	PA3133.3	noncoding	Tradis	Tradis	Tradis	Tradis
PA3151	hisF2	amino acid metabolism and biosynthesis	NE	Tradis	Tradis	Tradis
PA3166	pheA	amino acid metabolism and biosynthesis	NE	Tradis	Tradis	Tradis
PA3263	PA3263	Hypothetical unclassified	NE	Tradis	Tradis	Tradis
PA3288	PA3288	Hypothetical unclassified	NE	Tradis	Tradis	Tradis
PA3352	PA3352	Hypothetical unclassified	Tradis	NE	Tradis	Tradis
PA3442	PA3442	transport small molecules	NE	Tradis	Tradis	Tradis
PA3507	PA3507	putative enzyme	NE	Tradis	Tradis	Tradis
PA3642	rnhB	DNA replication and repair	NE	Tradis	Tradis	Tradis
PA3939	PA3939	Hypothetical unclassified	NE	Tradis	Tradis	Tradis
PA3941	PA3941	Hypothetical unclassified	NE	Tradis	Tradis	Tradis
PA3952	PA3952	Hypothetical unclassified	Tradis	Tradis	Tradis	Tradis
PA4018	PA4018	Hypothetical unclassified	NE	Tradis	Tradis	Tradis
PA4139	PA4139	Hypothetical unclassified	NE	Tradis	Tradis	Tradis
PA4219	ampO	membrane/ antibiotic resistance and susceptibility	NE	Tradis	Tradis	Tradis
PA4224	pchG	membrane/ transport small molecules	NE	Tradis	Tradis	Tradis
PA4225	pchF	secreted factors/ transport small molecules	Transit	Transit	Transit	Transit
PA4368	PA4368	Hypothetical unclassified	NE	Tradis	Tradis	Tradis
PA4422	PA4422	Hypothetical unclassified	NE	Tradis	Tradis	Tradis
PA4457	PA4457	secreted factors	Tradis	Tradis	Tradis	Tradis
PA4531	PA4531	Hypothetical unclassified	Tradis	Tradis	Tradis	Tradis
PA4541.3	PA4541.3	noncoding	NE	Tradis	Tradis	Tradis
PA4558	PA4558	chaperones and heatshock/ translation and post-translational modification	NE	Tradis	Tradis	Tradis
PA4673.1	PA4673.1	noncoding	Tradis	Tradis	Tradis	Tradis
PA4758	carA	nucleotide biosynthesis and metabolism/amino acid metabolism and biosynthesis	Transit	Transit	Tradis	Tradis
PA4760	dnaJ	adaptation and protection/ DNA replication and repair/ chaperones and heatshock	Transit	Tradis	Tradis	Tradis
PA4824	PA4824	Hypothetical unclassified	NE	Tradis	Tradis	Tradis
PA4998	PA4998	Hypothetical unclassified	NE	Tradis	Tradis	Tradis
PA5004	wapH	putative enzyme	Transit	Tradis	Tradis	Tradis
PA5015	aceE	amino acid metabolism and biosynthesis/ energy metabolism	Transit	Both	Transit	Both
PA5062	PA5062	Hypothetical unclassified	Tradis	NE	Tradis	Tradis
PA5068	tatA	protein secretion and export	NE	Tradis	Tradis	Tradis
PA5069	tatB	protein secretion and export	NE	Tradis	Tradis	Tradis
PA5160.1	PA5160.1	noncoding	Tradis	Tradis	Tradis	Tradis
PA5366	pstB	membrane/ transport small molecules	Transit	Tradis	Tradis	Tradis
PA5406	PA5406	Hypothetical unclassified	Tradis	Tradis	Tradis	Tradis
PA5426	purE	nucleotide biosynthesis and metabolism	Tradis	Tradis	Tradis	Tradis
PA5565	gidA	cell division	Transit	Transit	Tradis	Tradis
PA5567	PA5567	putative enzyme	NE	Tradis	Tradis	Tradis
